# Supplementary material for: Assessing the Benefits of Climate-Sensitive Design with Nature-Based Solutions for Climate Change Adaptation in Urban Regeneration: A Case Study in Cheltenham, UK
Source: MDPI journal article supplement (doi:10.3390/su152215855), 2023-11-11

## Supplementary Materials: Figures S1–S36

Figure S1: Potential air temperature with vegetation for existing scenario 2017

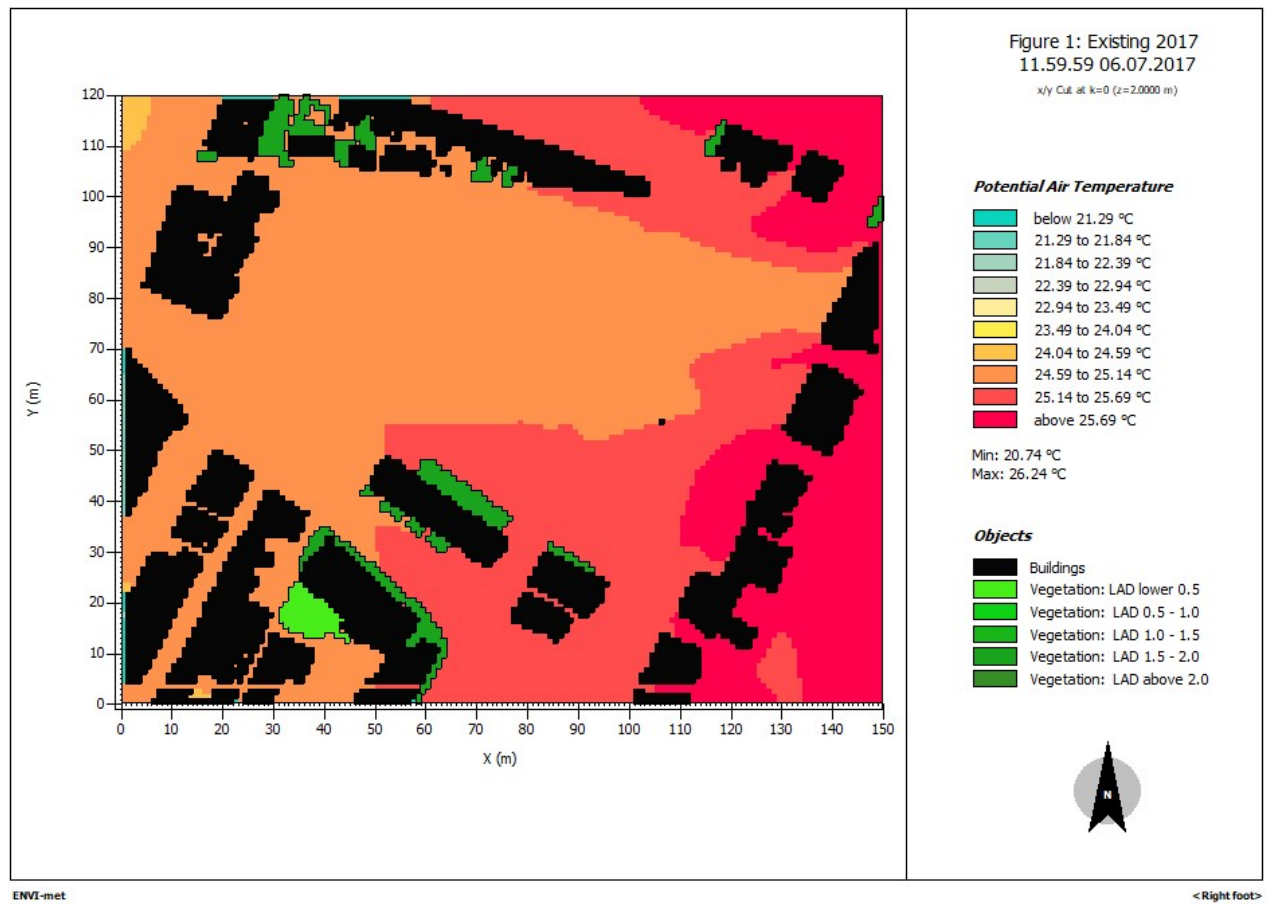

Figure S2: Potential air temperature with existing scenario 2017

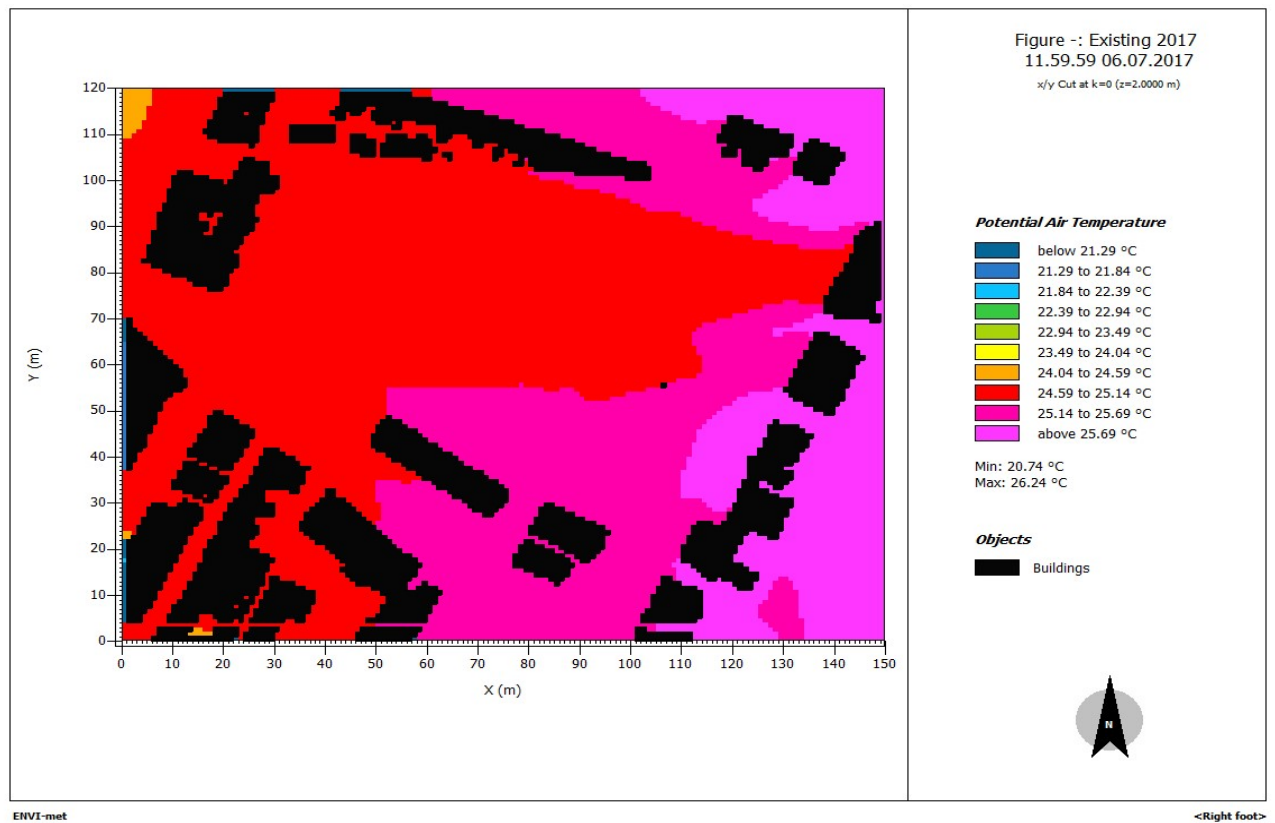

Figure S3: Relative Humidity for existing scenario 2017

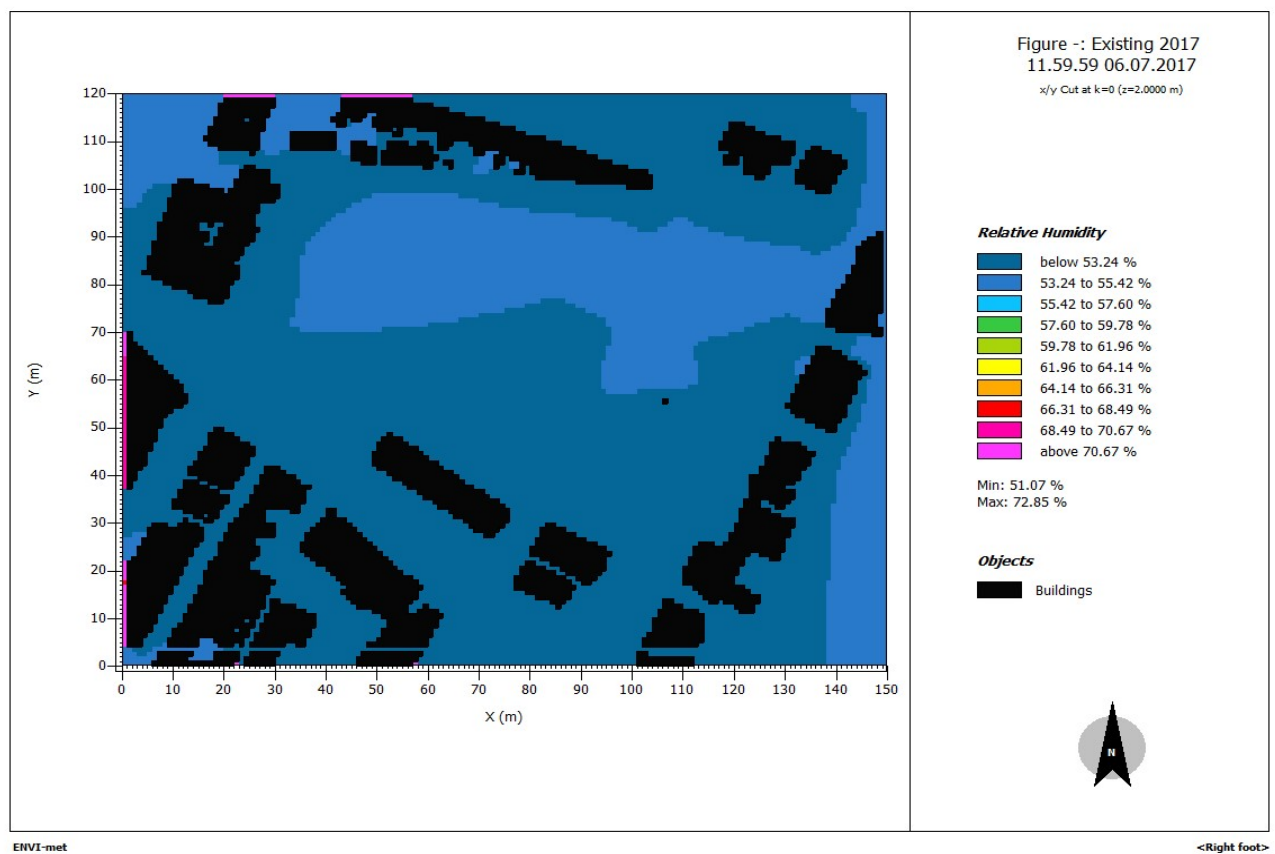

Figure S4: Mean radiant temperature for existing scenario 2017

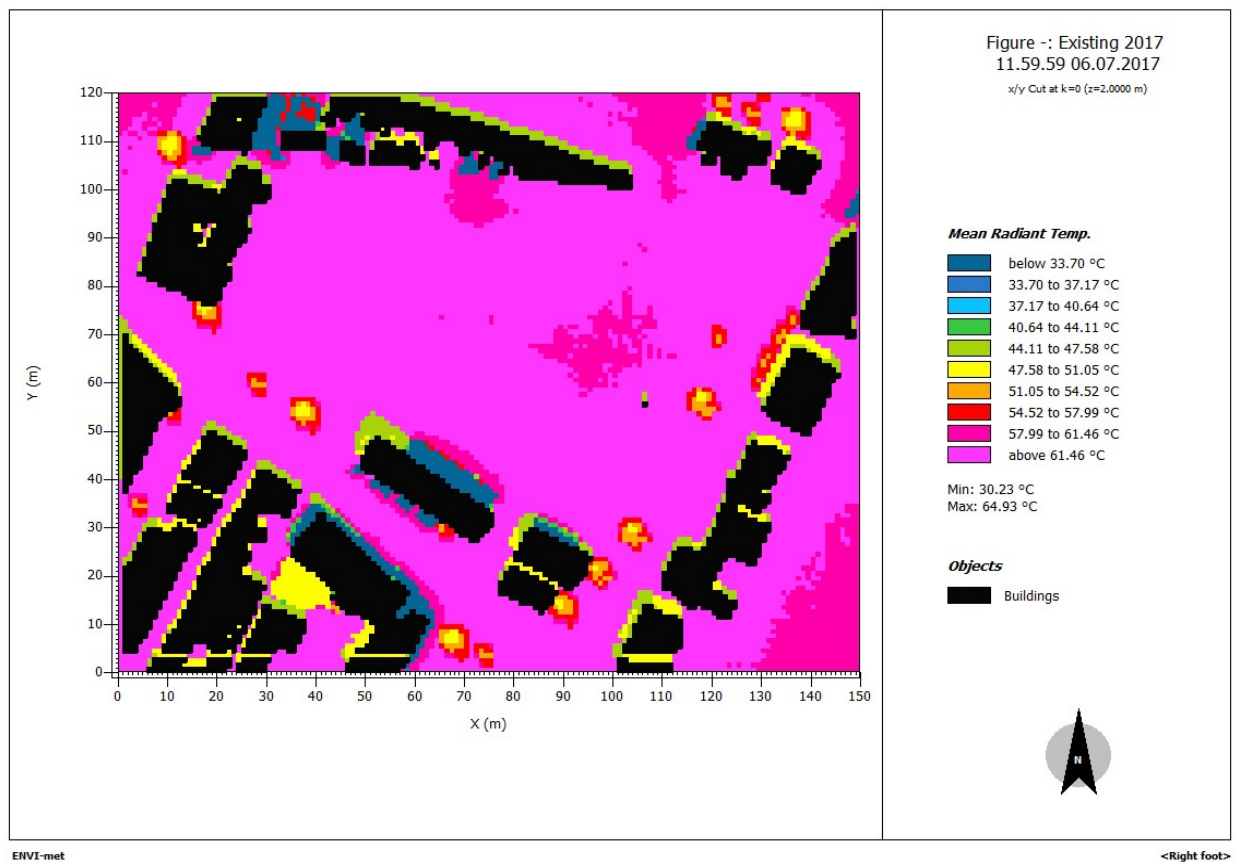

Figure S5: Wind speed for existing scenario 2017

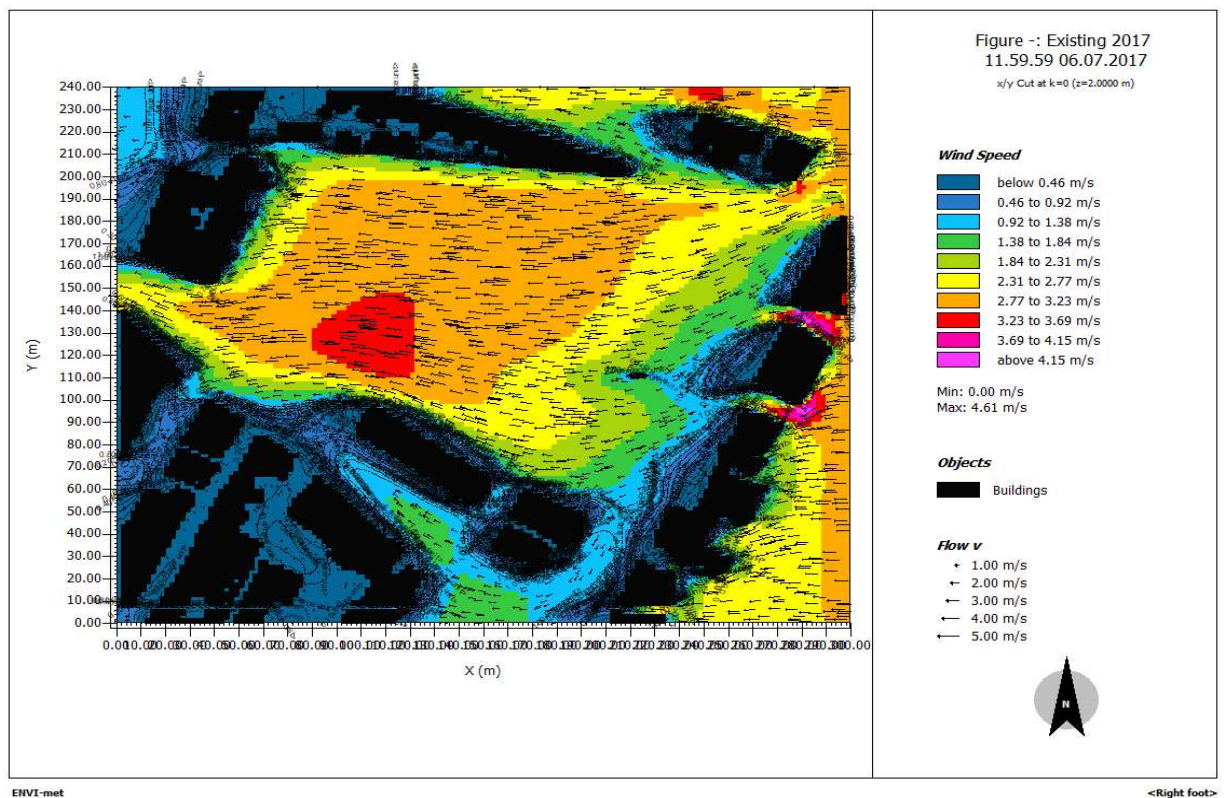



Figure S6: Thermal comfort PMV value for existing scenario 2017

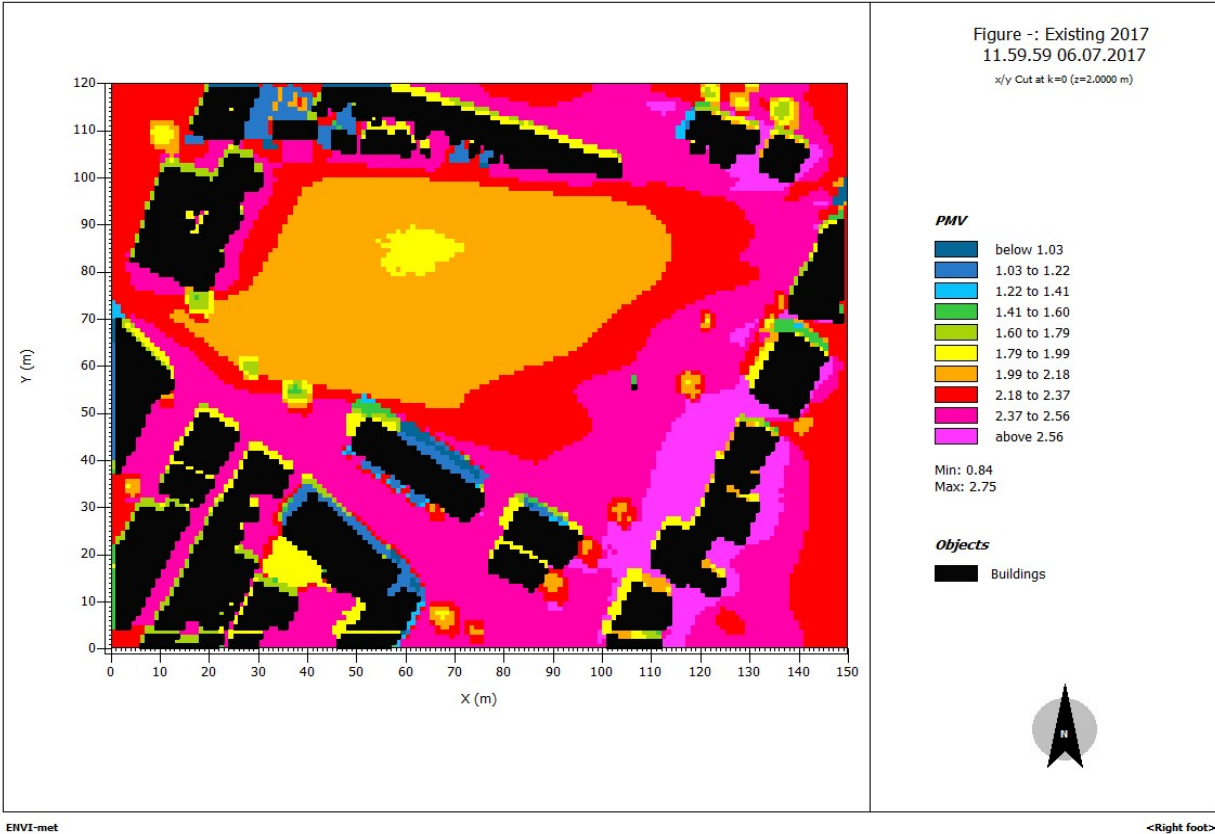

Figure S7: Potential air temperature with vegetation for existing scenario 2050

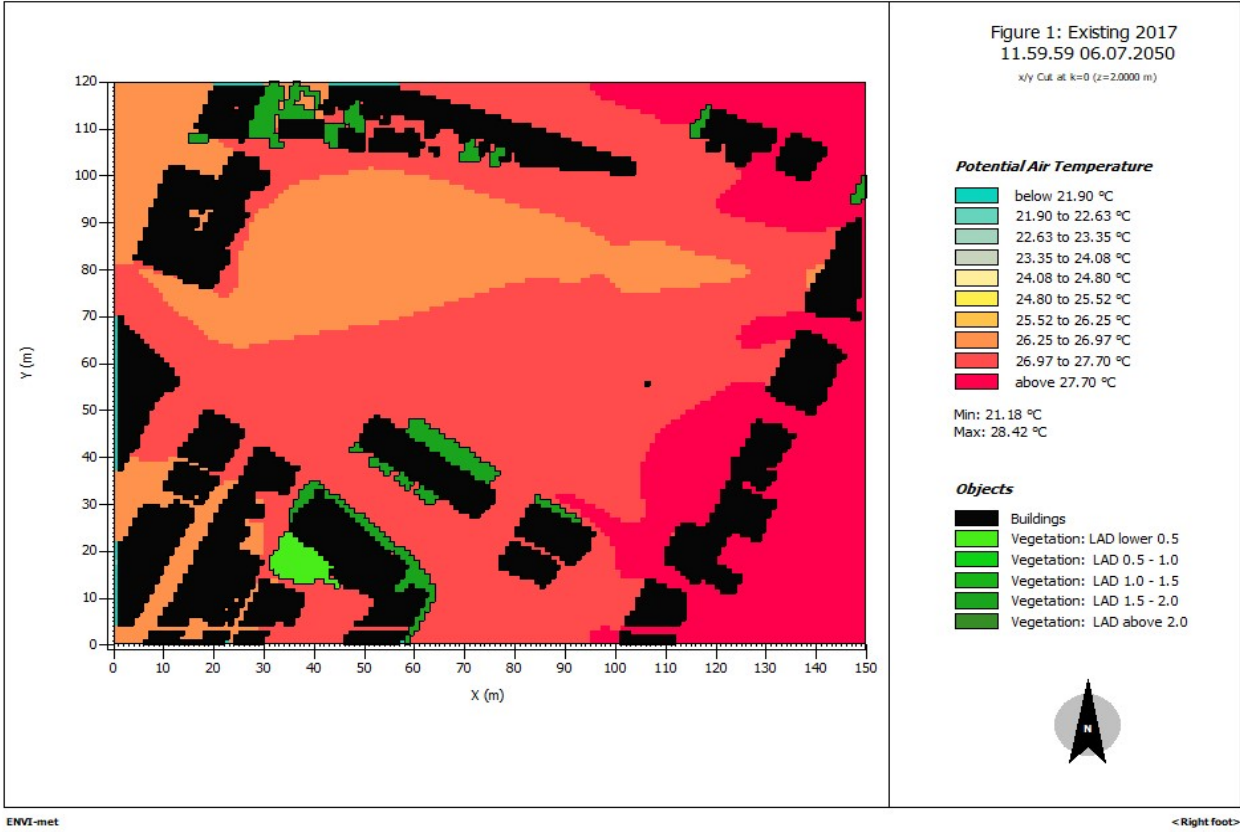

Figure S8: Potential air temperature for existing scenario 2050

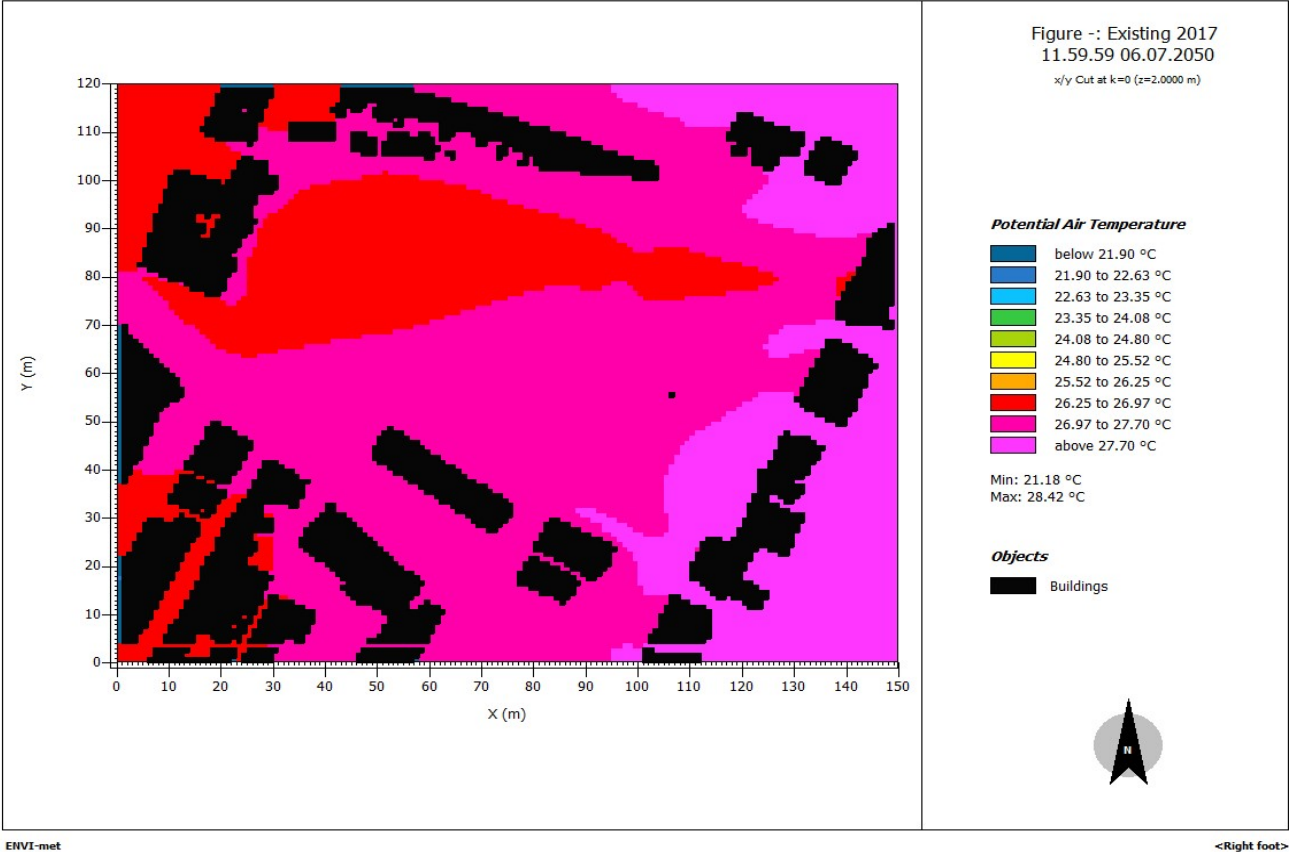

Figure S9: Relative humidity for existing scenario 2050

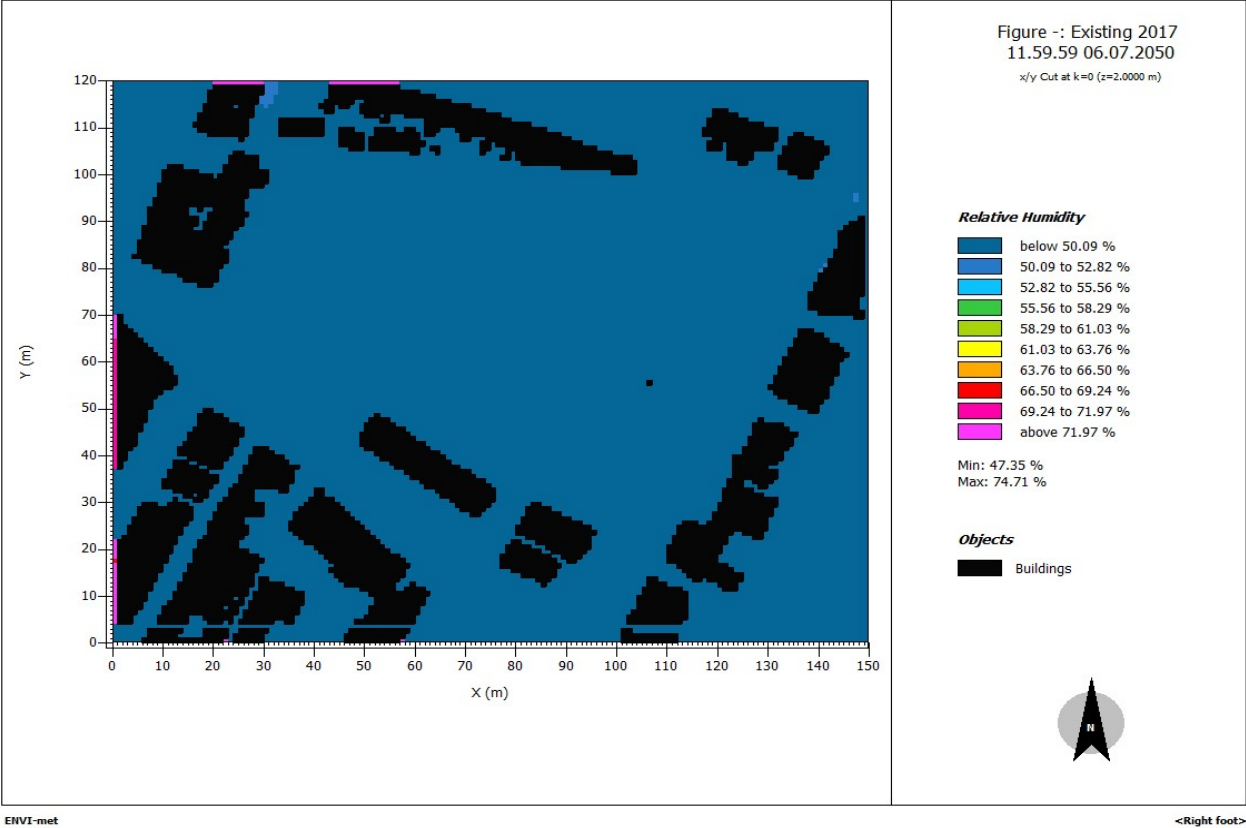

Figure S10: Mean radiant temperature for existing scenario 2050

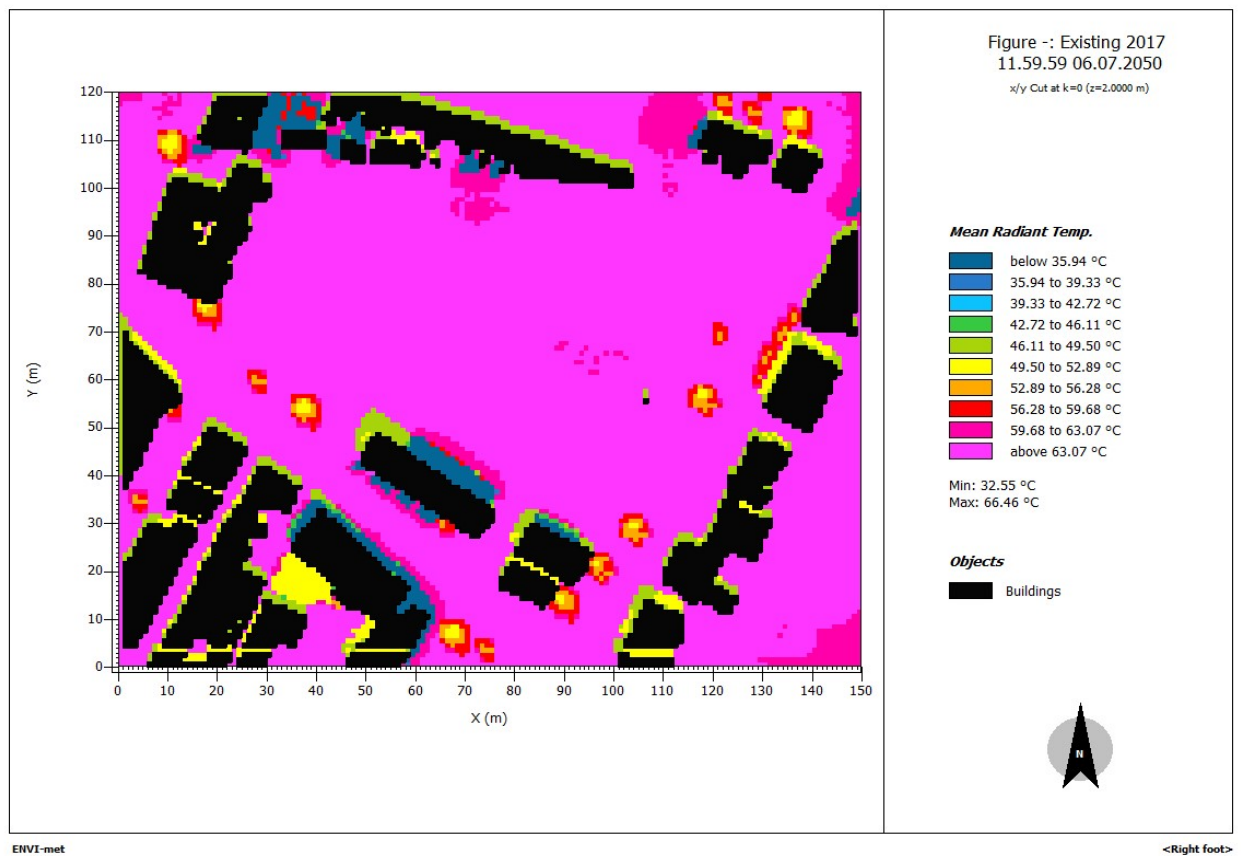

Figure S11: Wind speed for existing scenario 2050

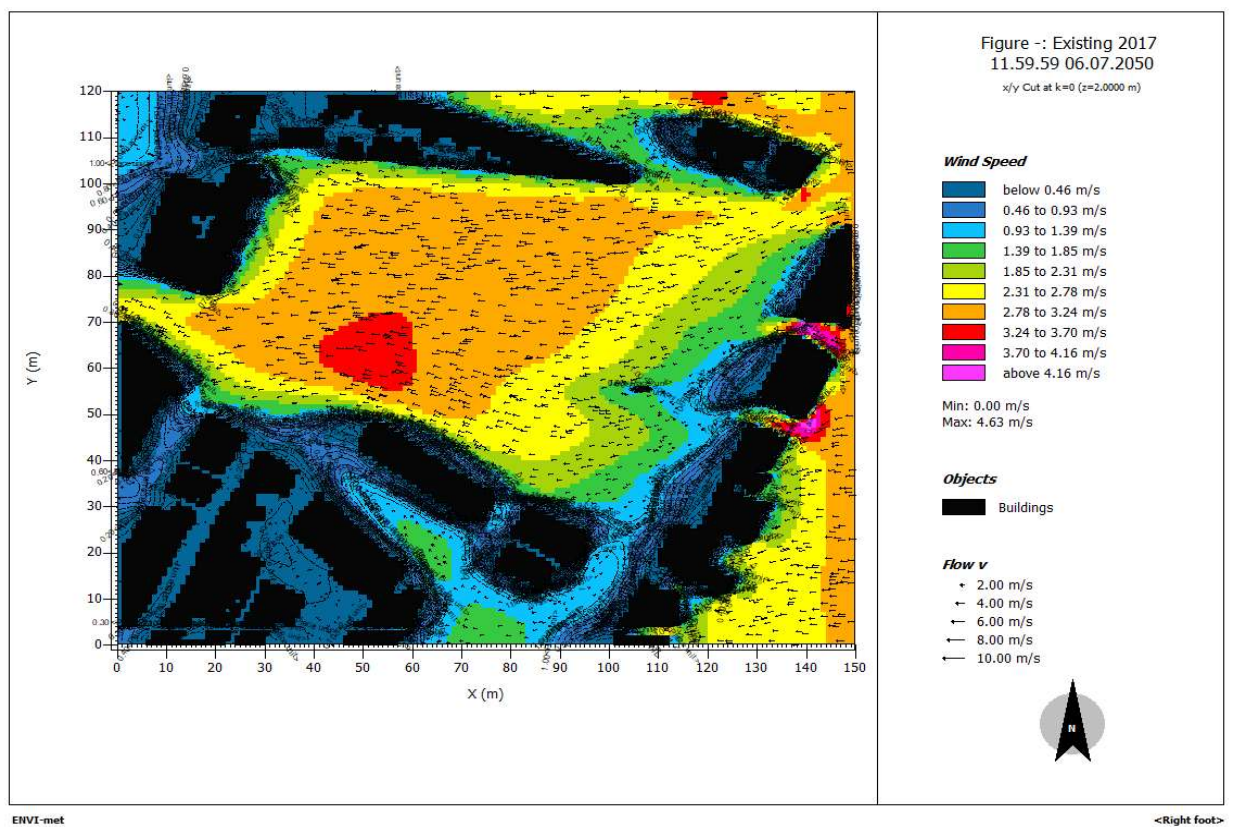



Figure S12: Thermal comfort PMV value for existing scenario 2050

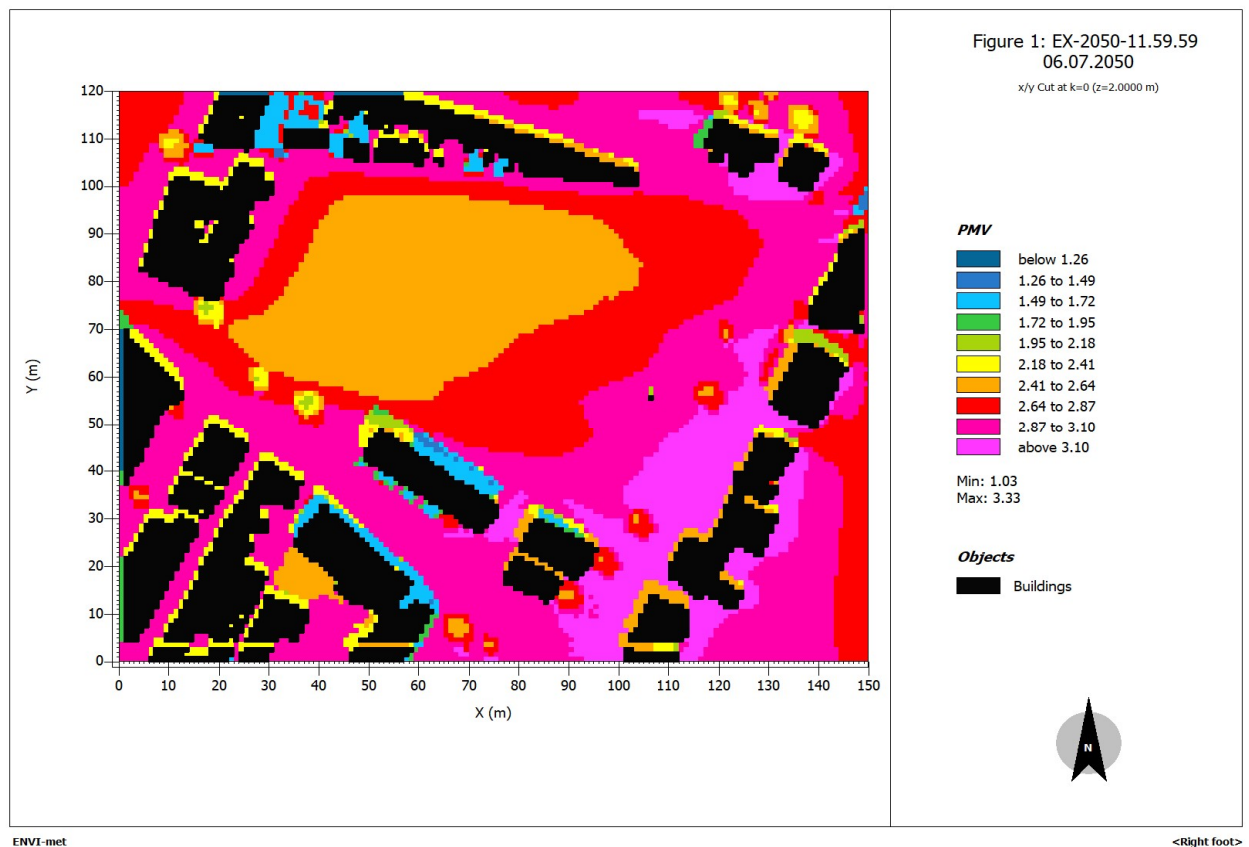

Figure S13: Potential air temperature with vegetation for scenario 30% NBS 2017

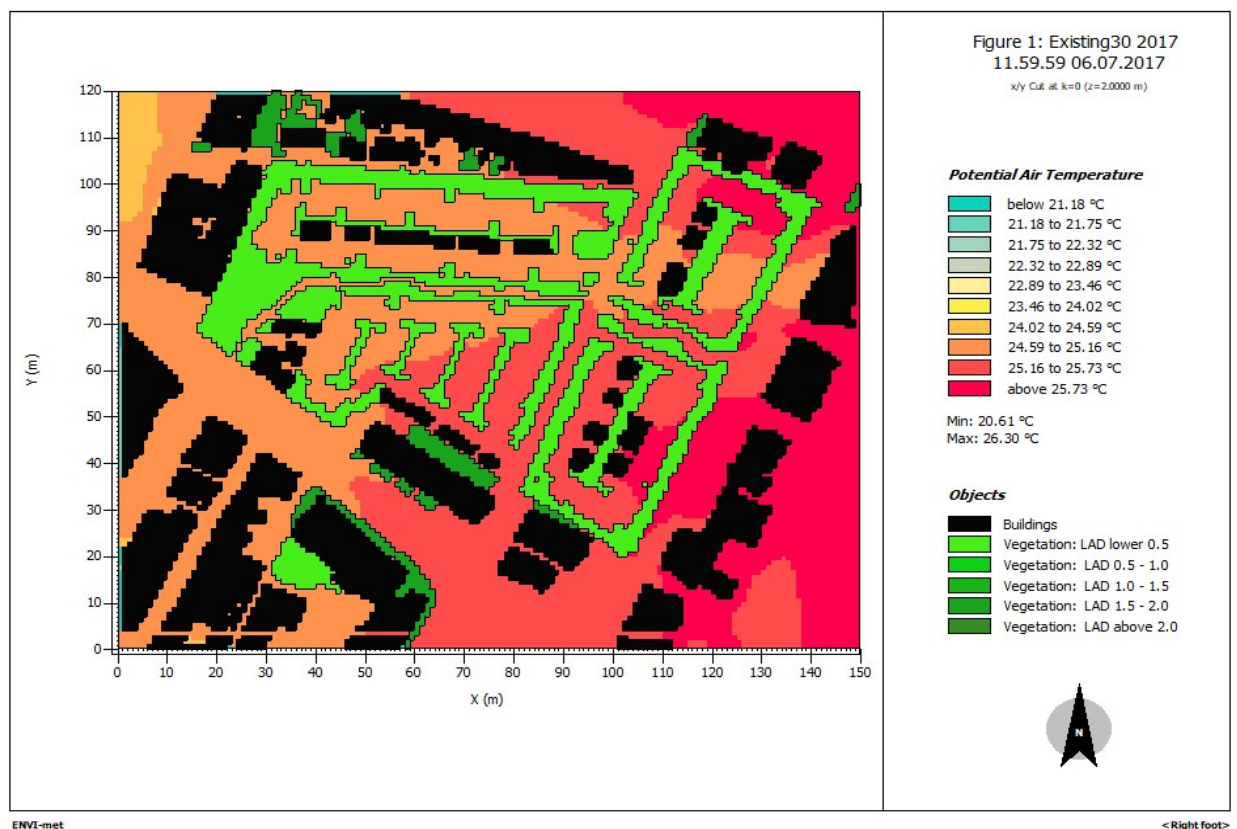

Figure S 14: Potential air temperature for scenario 30% NBS 2017

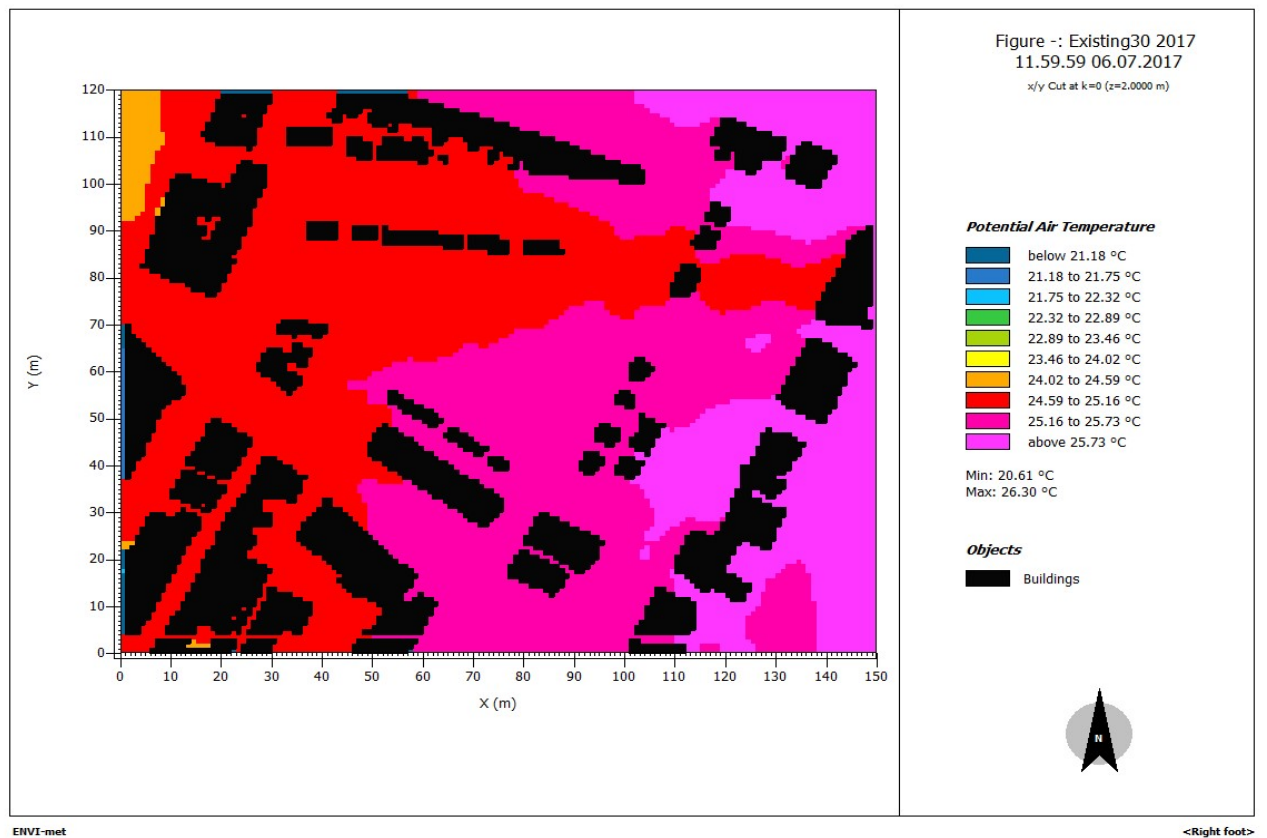

Figure S15: Relative humidity for scenario 30% NBS 2017

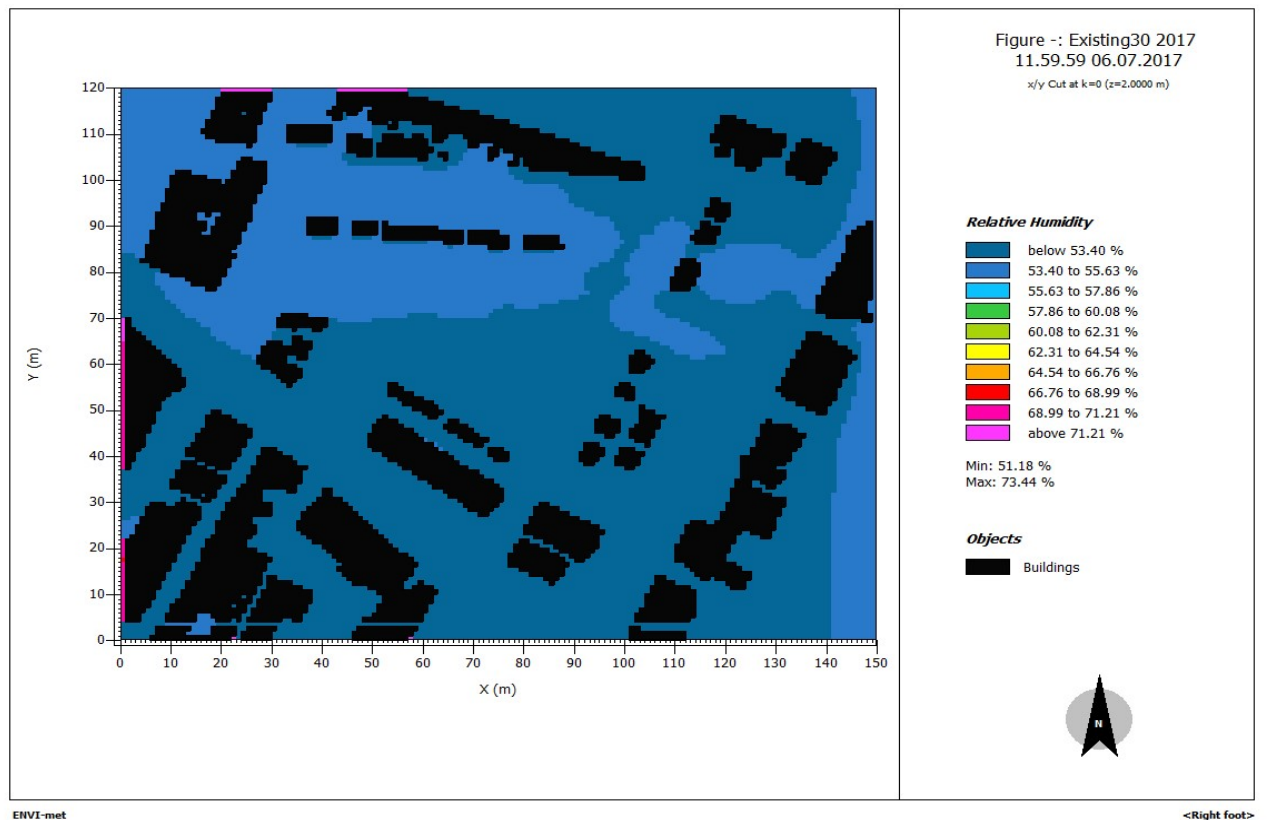



Figure S 16: Mean radiant temperature for scenario 30% NBS 2017

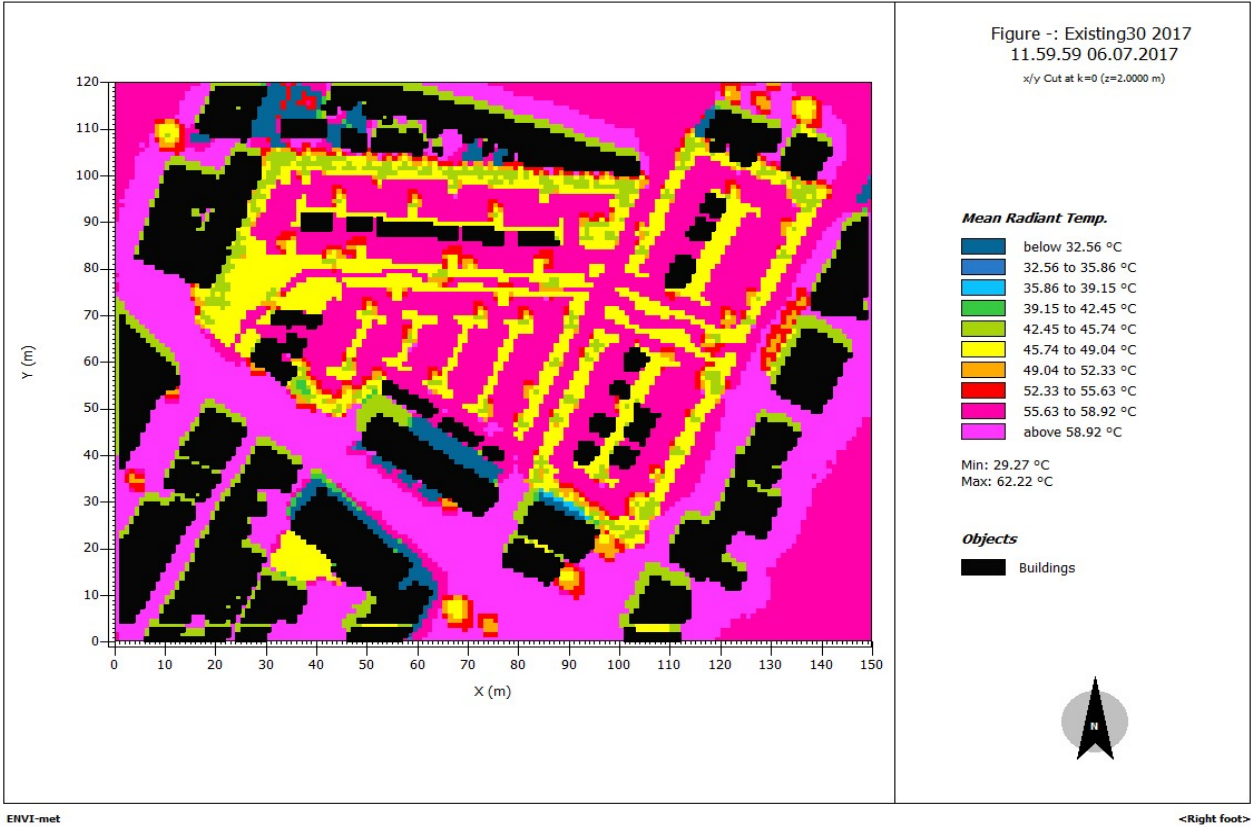

Figure S17: Wind speed for scenario 30% NBS 2017

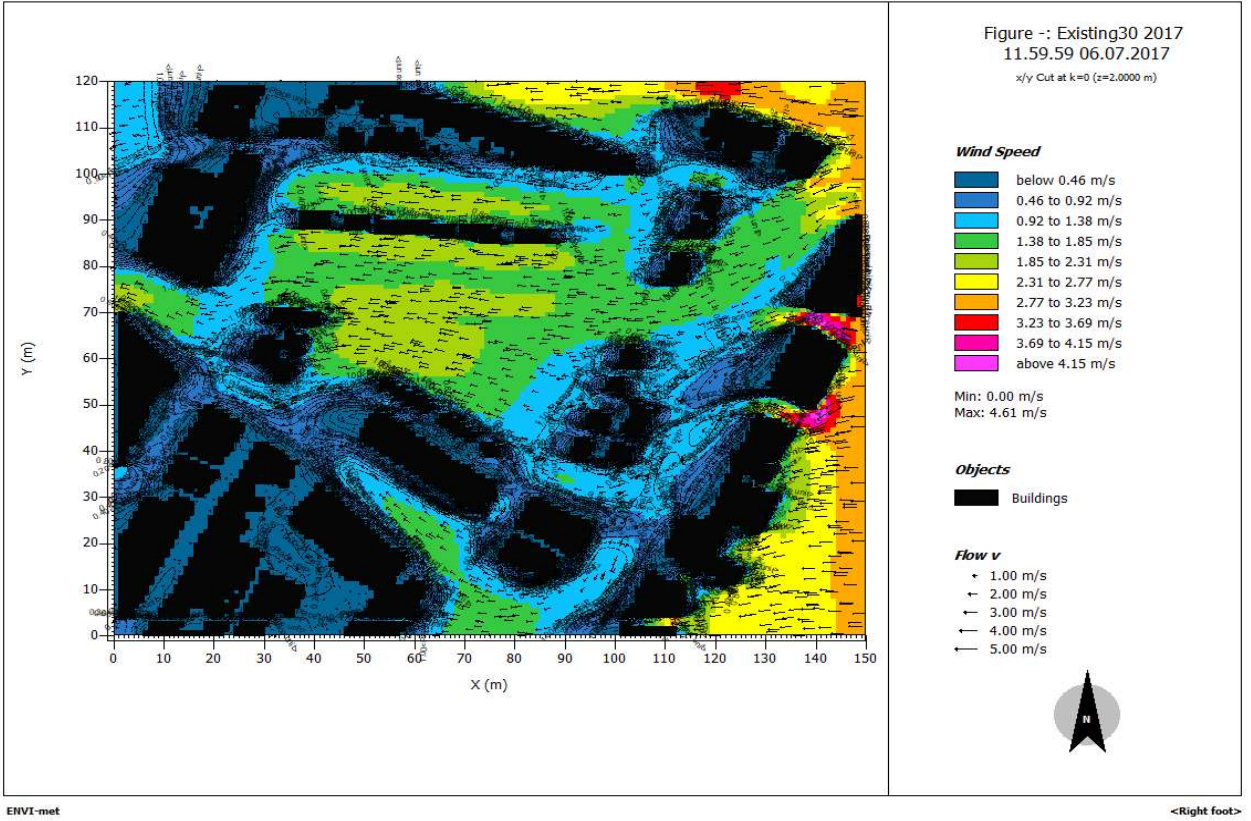

Figure S18: Thermal comfort PMV value for scenario 30% NBS 2017

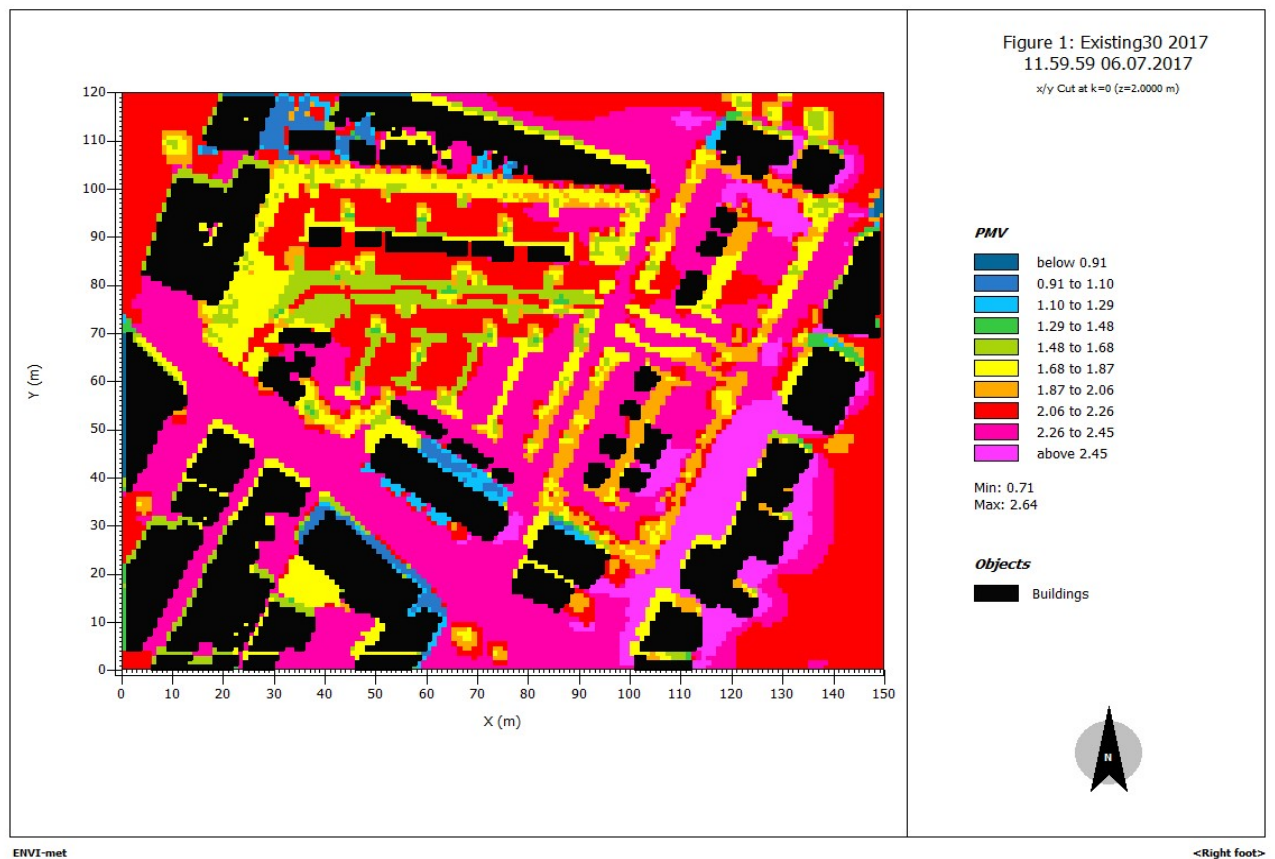

Figure S19: Potential air temperature with vegetation for scenario 30% NBS 2050

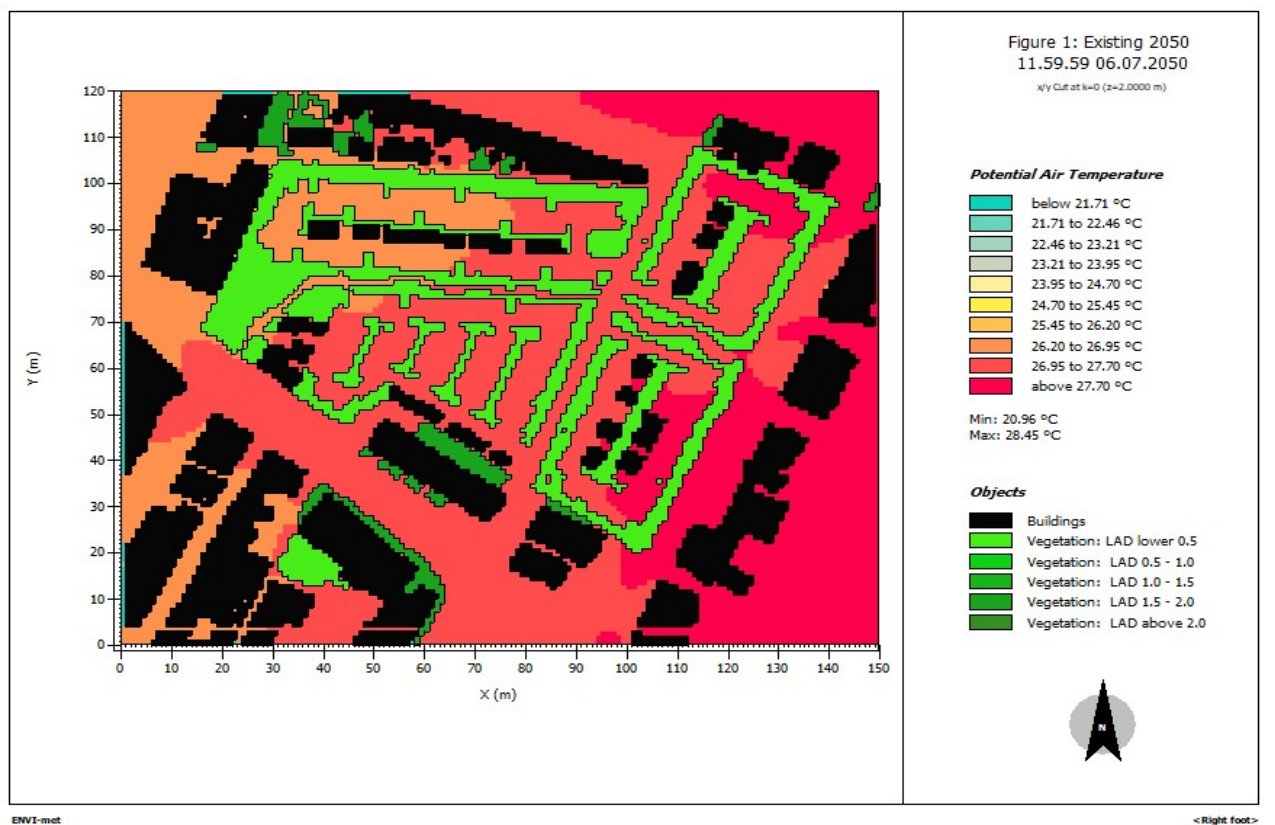



Figure S20: Potential air temperature for scenario 30% NBS 2050

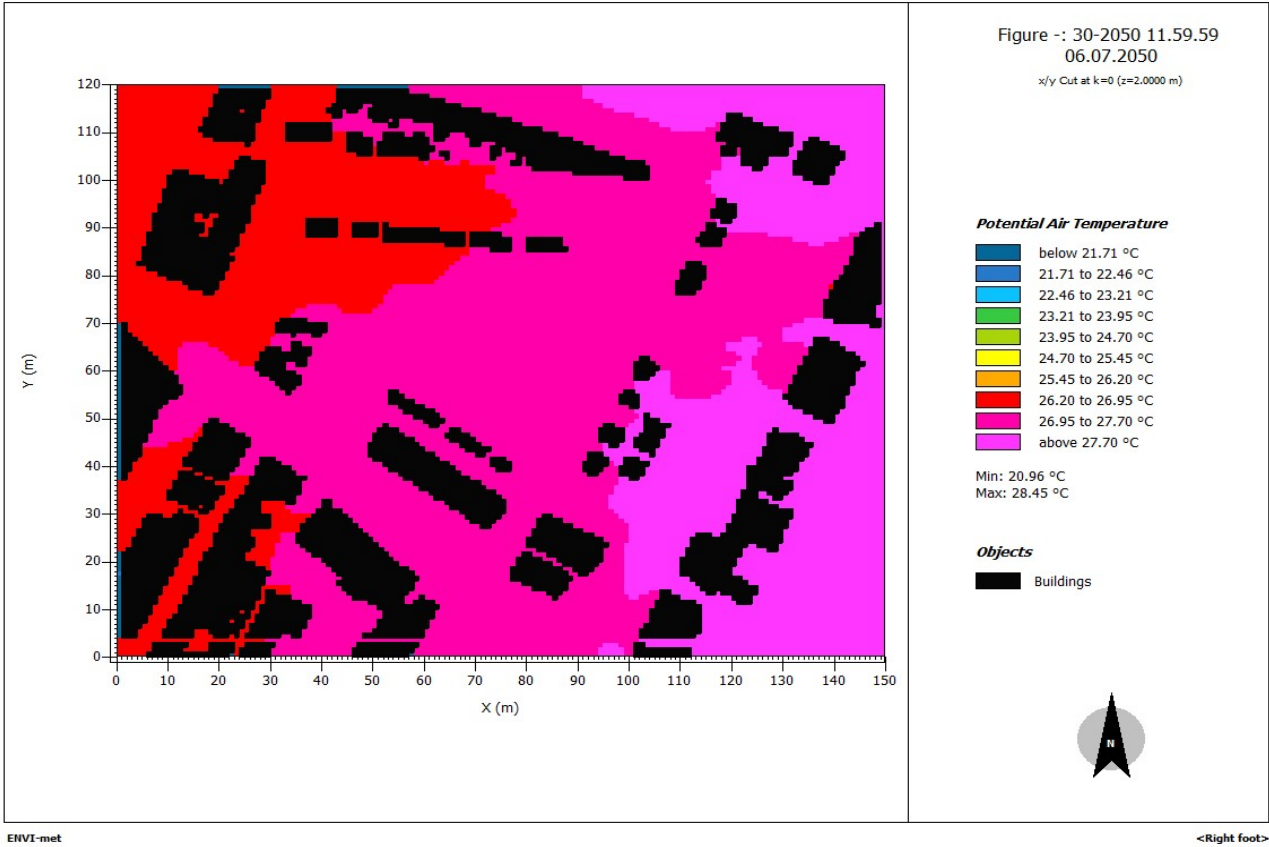

Figure S21: Relative humidity for scenario 30% NBS 2050

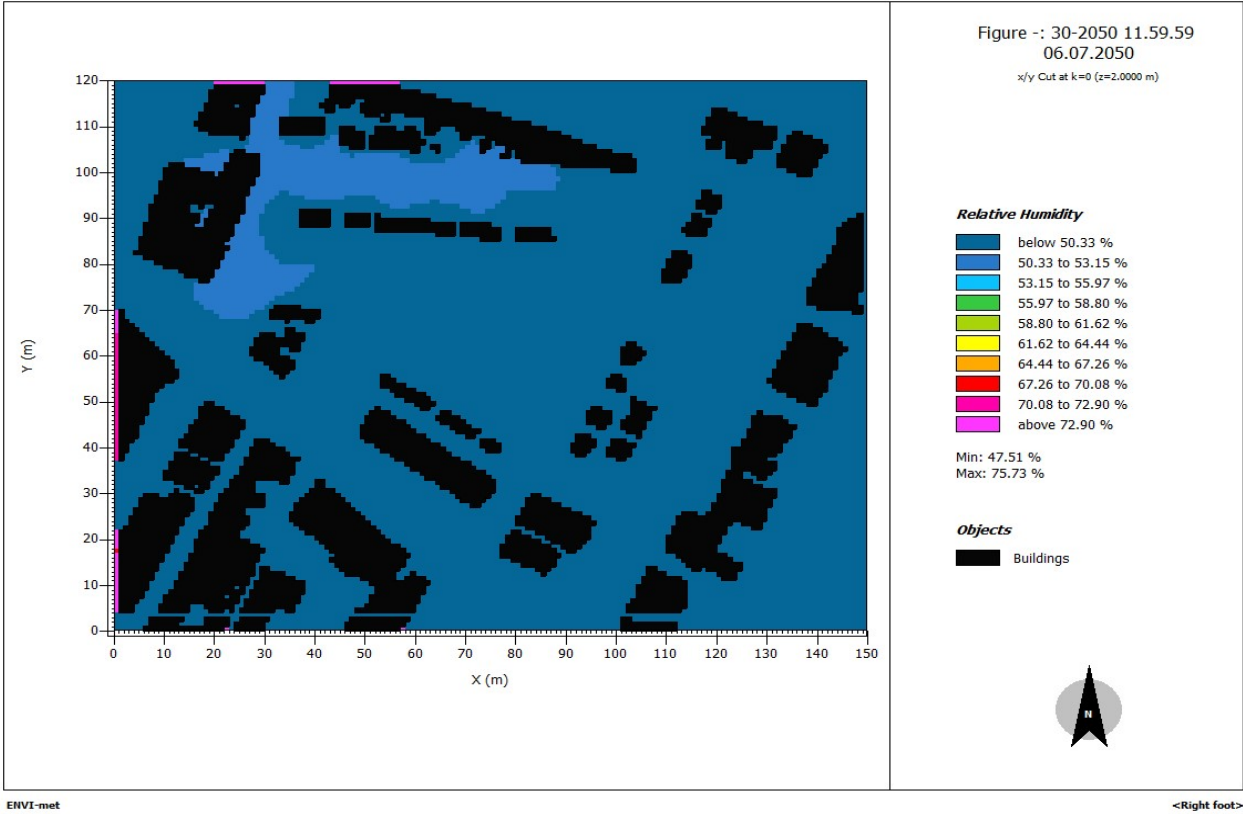



Figure S22: Mean radiant temperature for scenario 30% NBS 2050

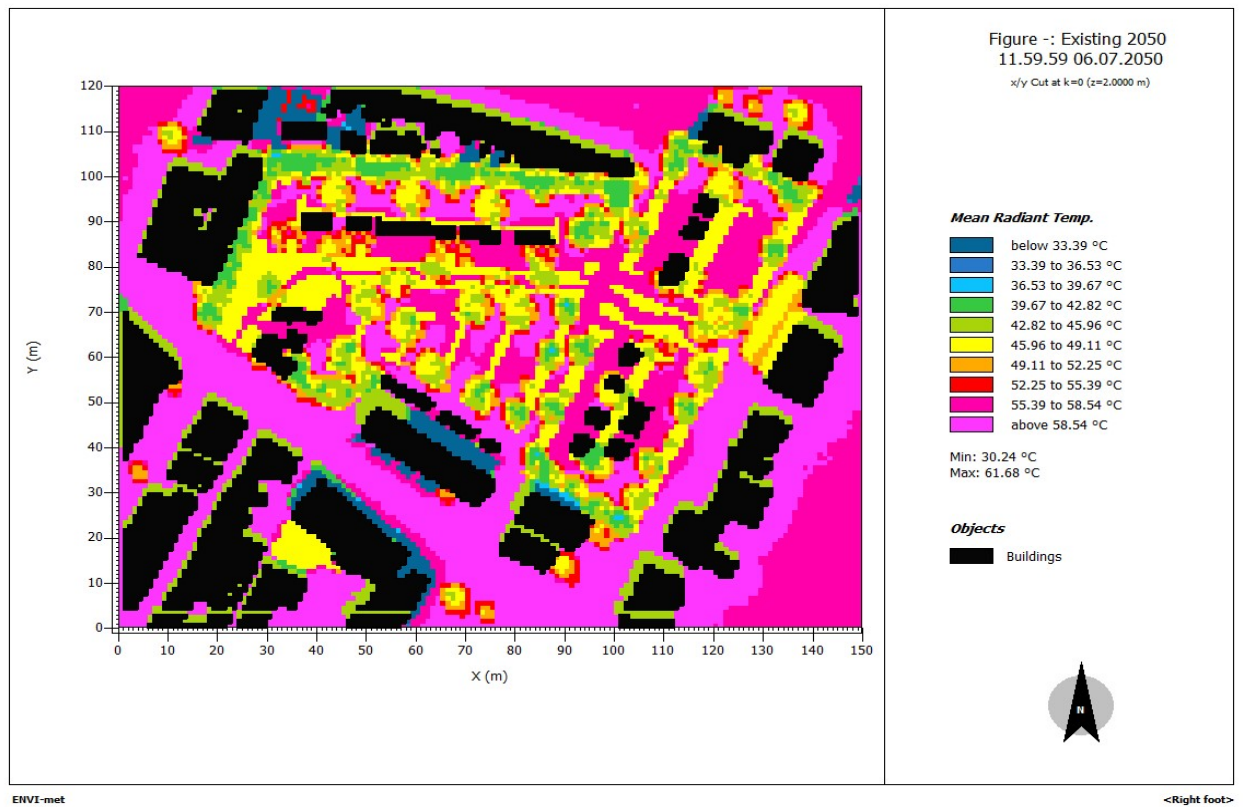

Figure S23: Wind speed for scenario 30% NBS 2050

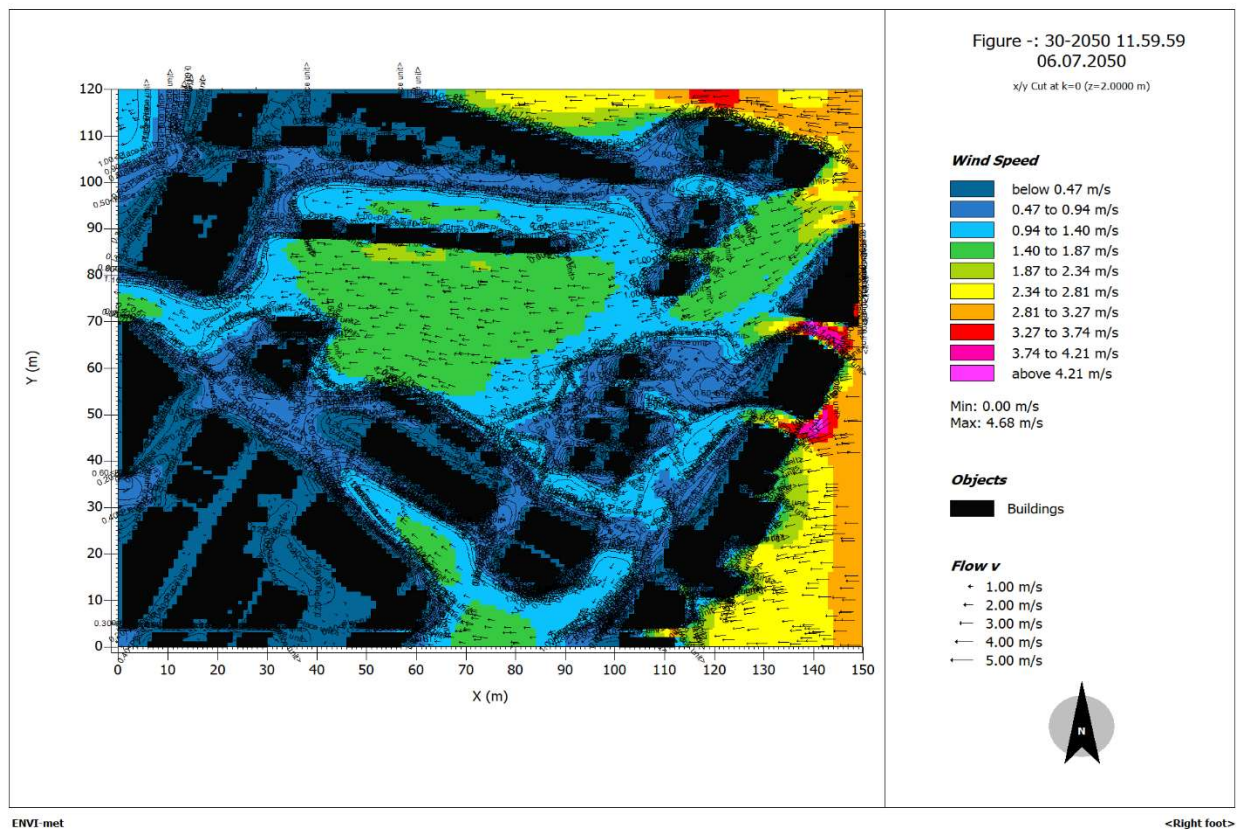

Figure S24: Thermal comfort PMV value for scenario 30% NBS 2050

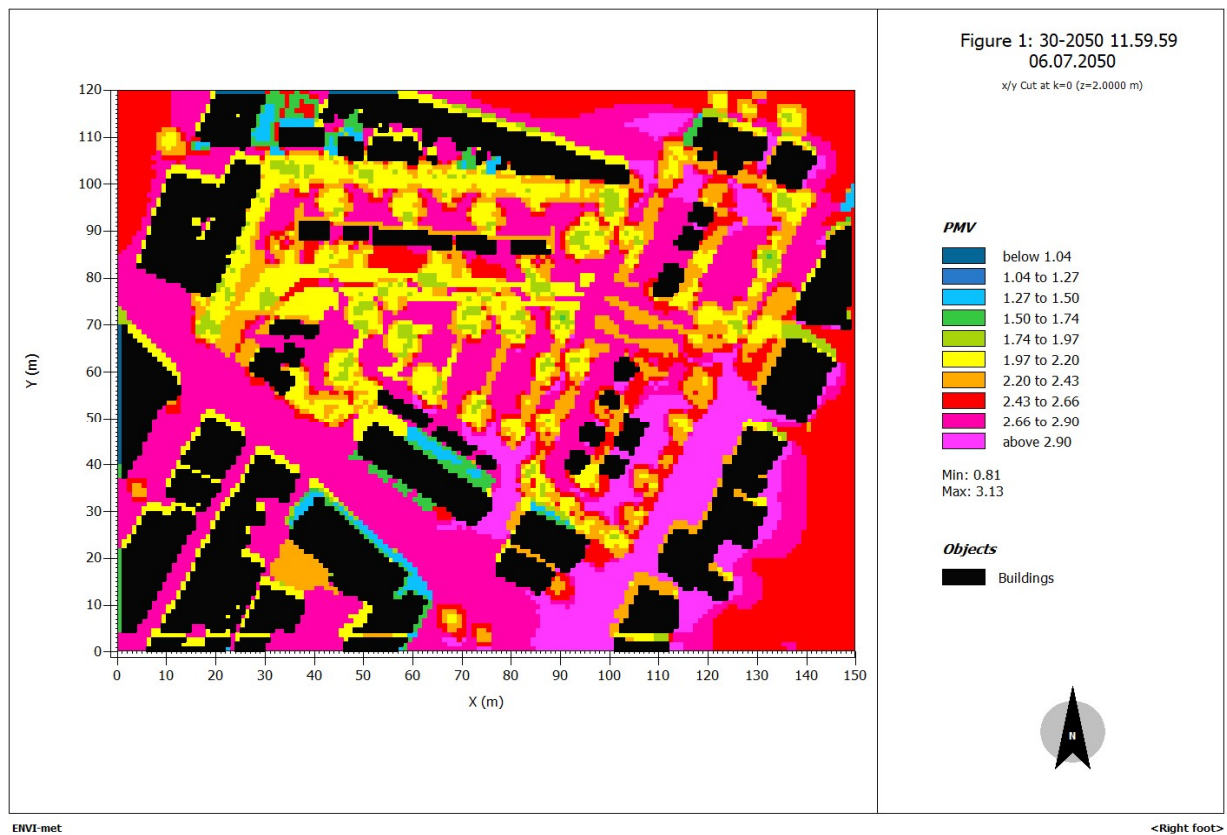

Figure S25: Potential air temperature with vegetation for scenario 50% NBS 2017

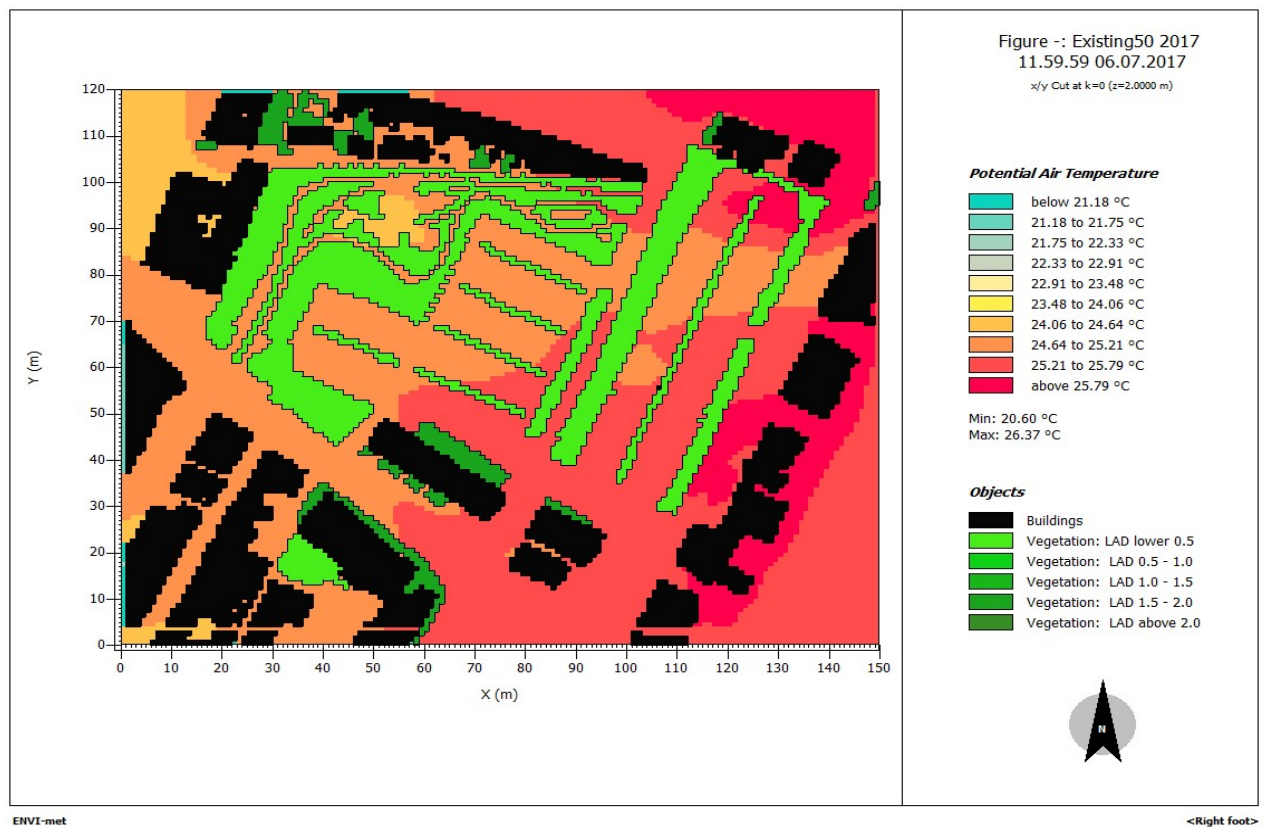

Figure S26: Potential air temperature for scenario 50% NBS 2017

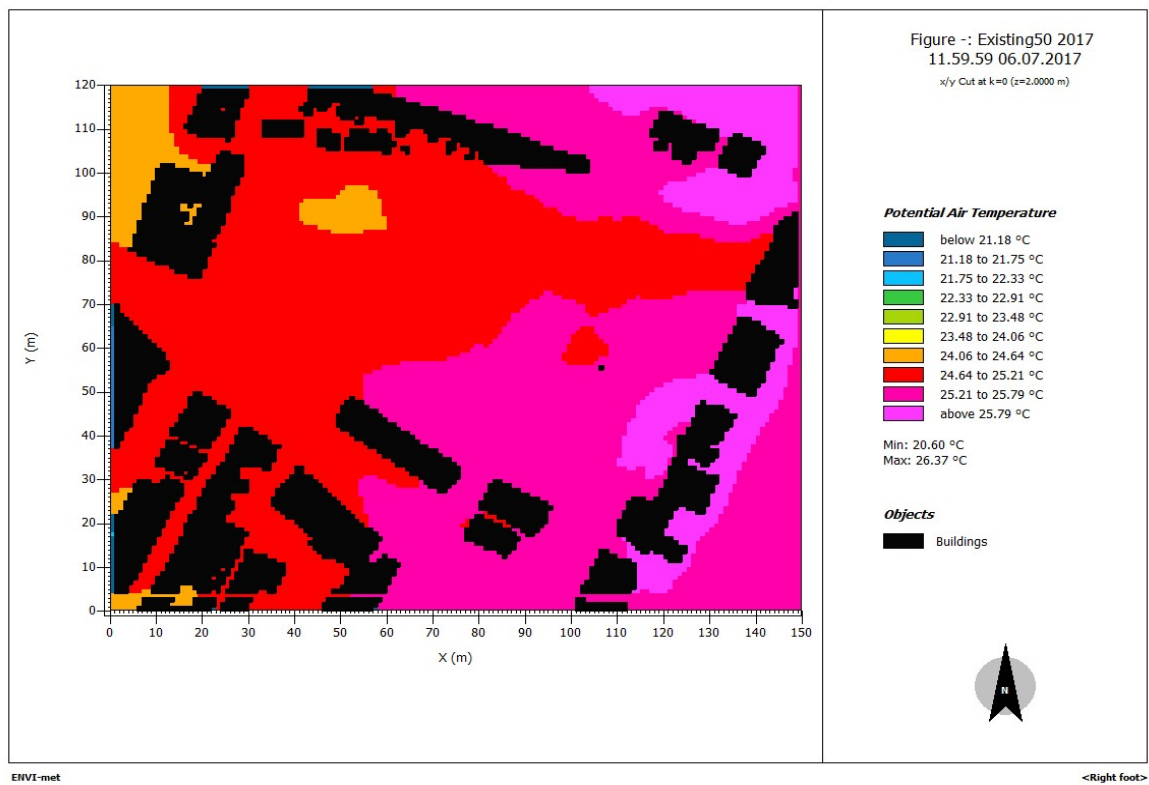

Figure S27: Relative humidity for scenario 50% NBS 2017

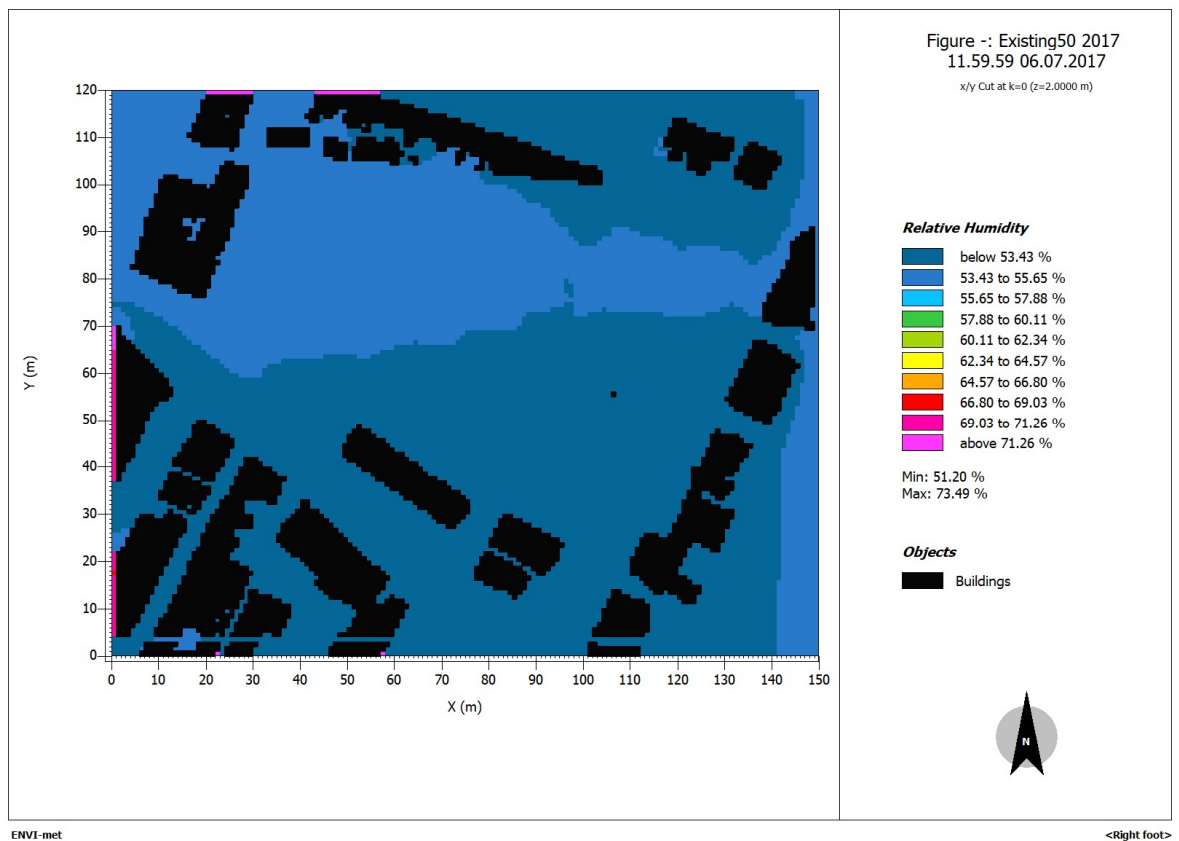



Figure S28: Mean radiant temperature for scenario 50% NBS 2017

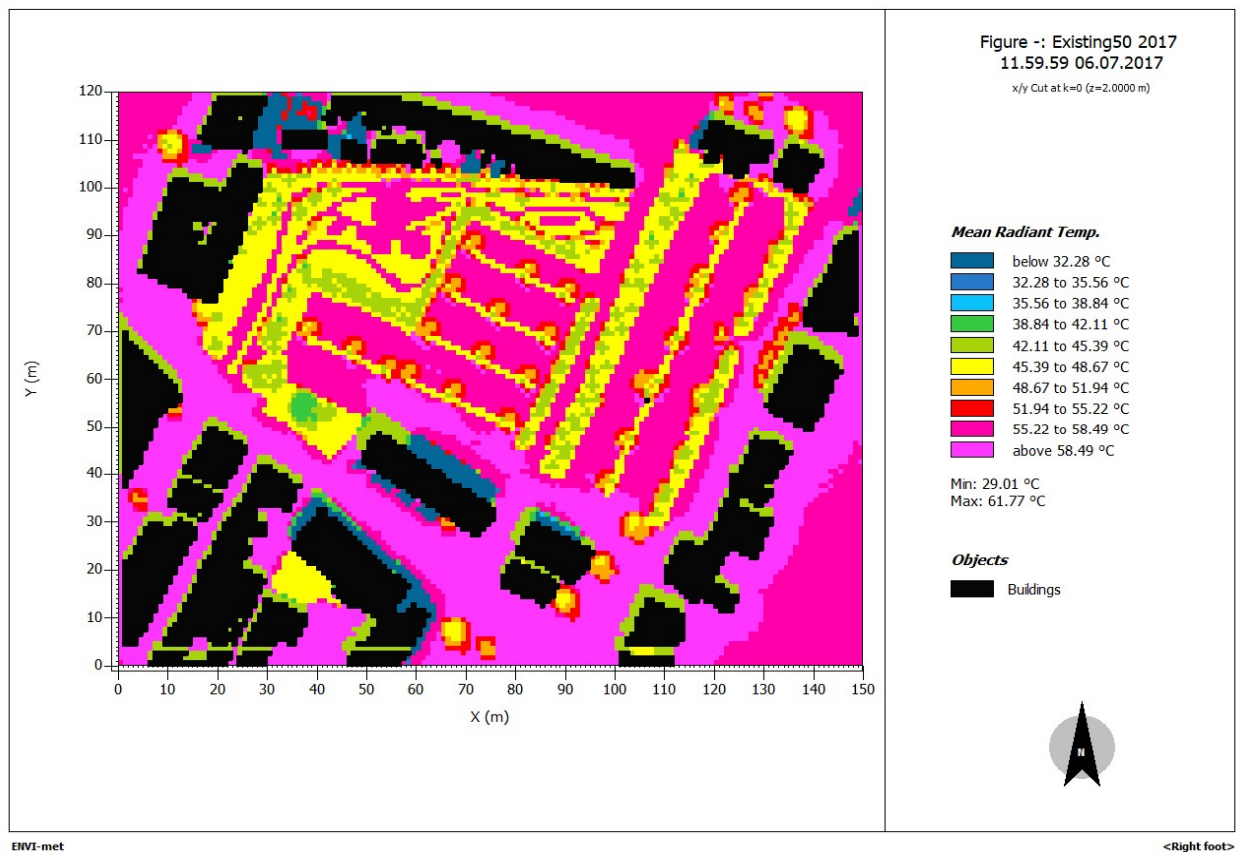

Figure S29: Wind speed for scenario 50% NBS 2017

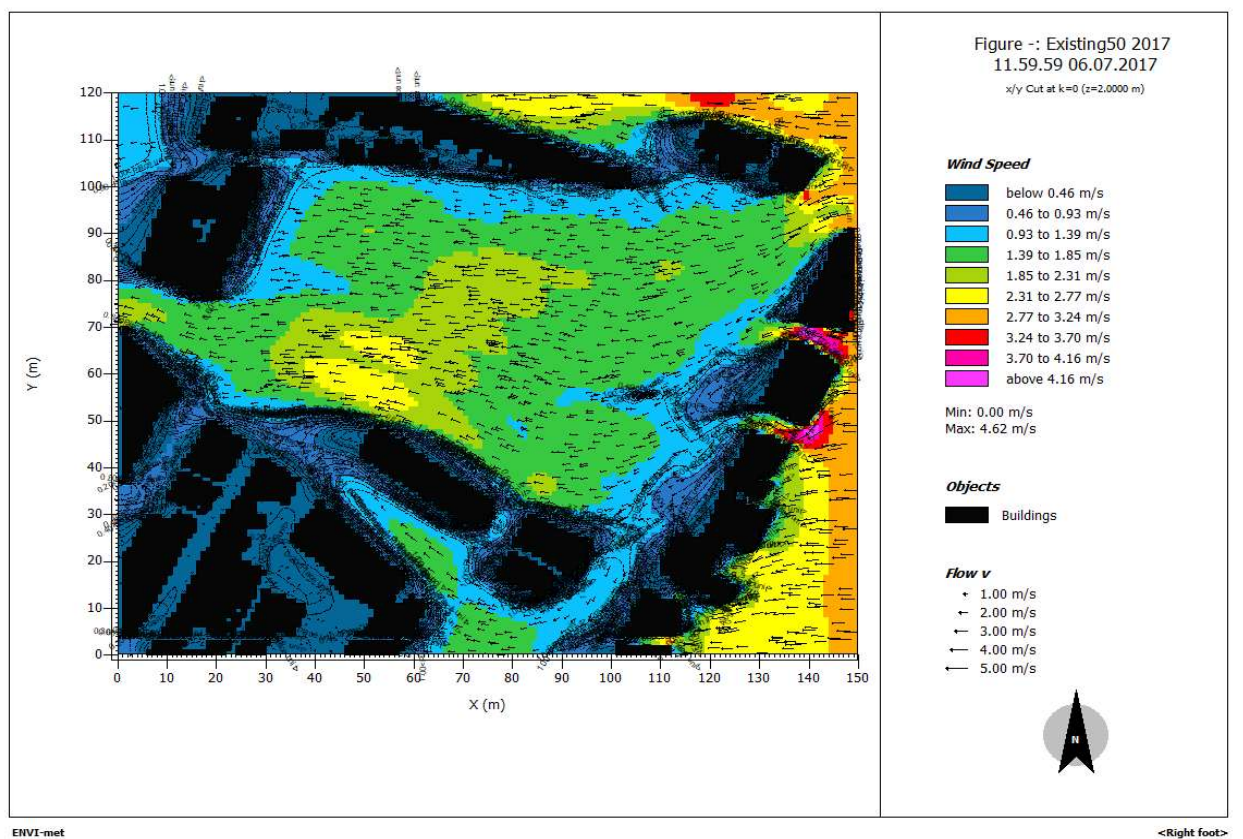

Figure S30: Thermal comfort PMV value for scenario 50% NBS 2017

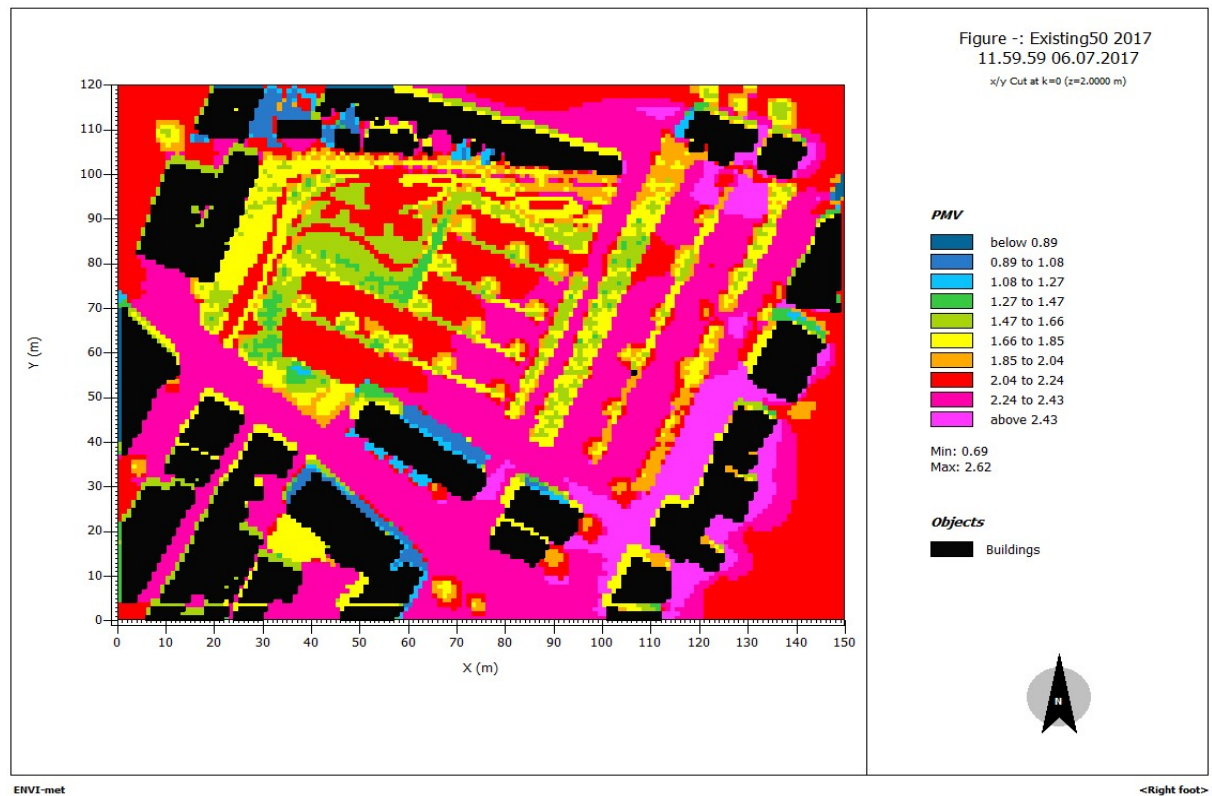

Figure S31: Potential air temperature with vegetation for scenario 50% NBS 2050

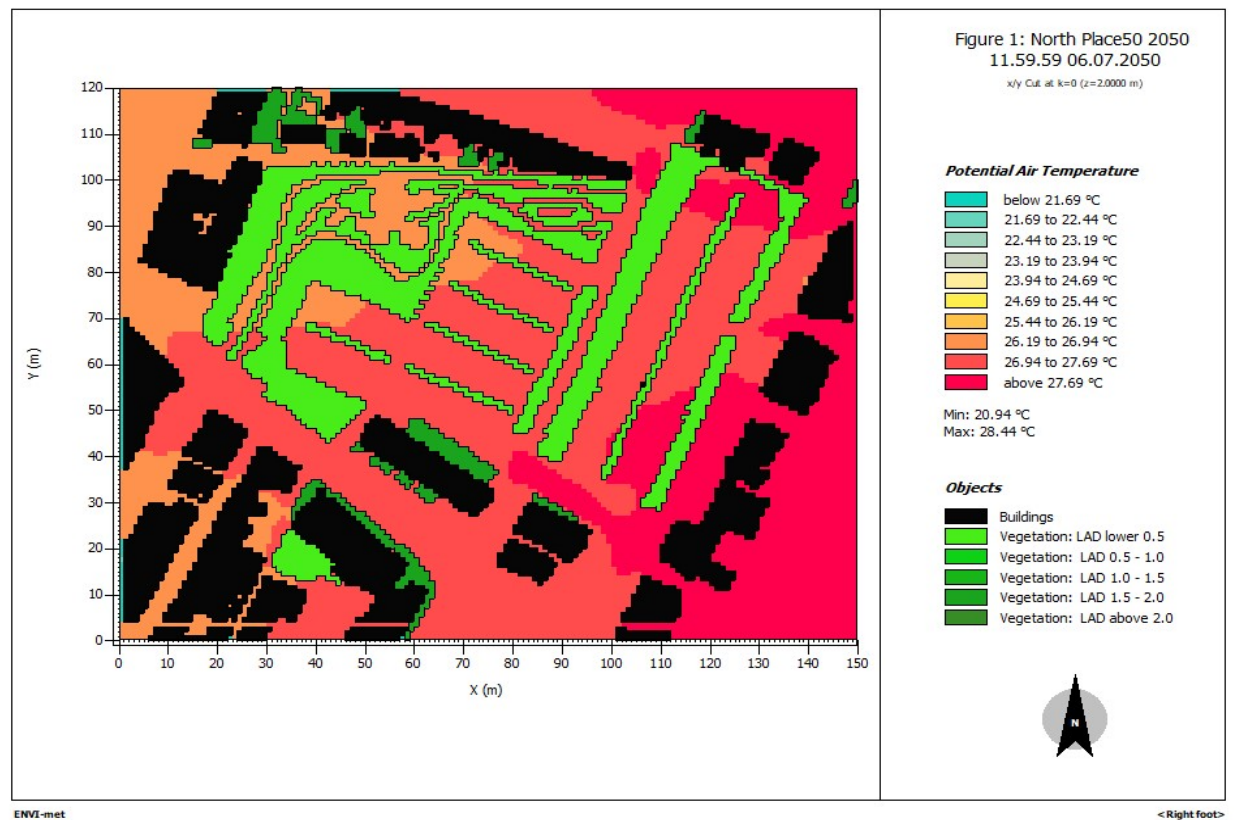

Figure S32: Potential air temperature for scenario 50% NBS 2050

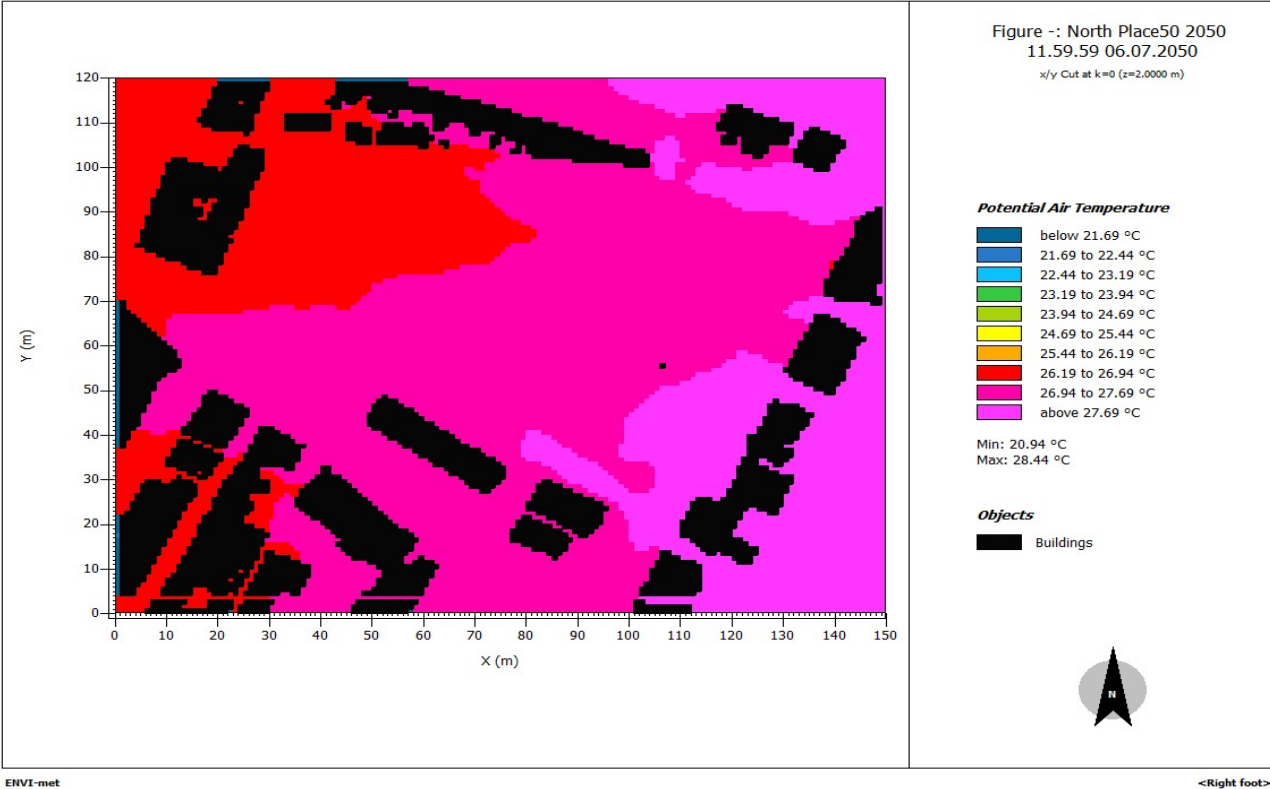

Figure S33: Relative humidity for scenario 50% NBS 2050

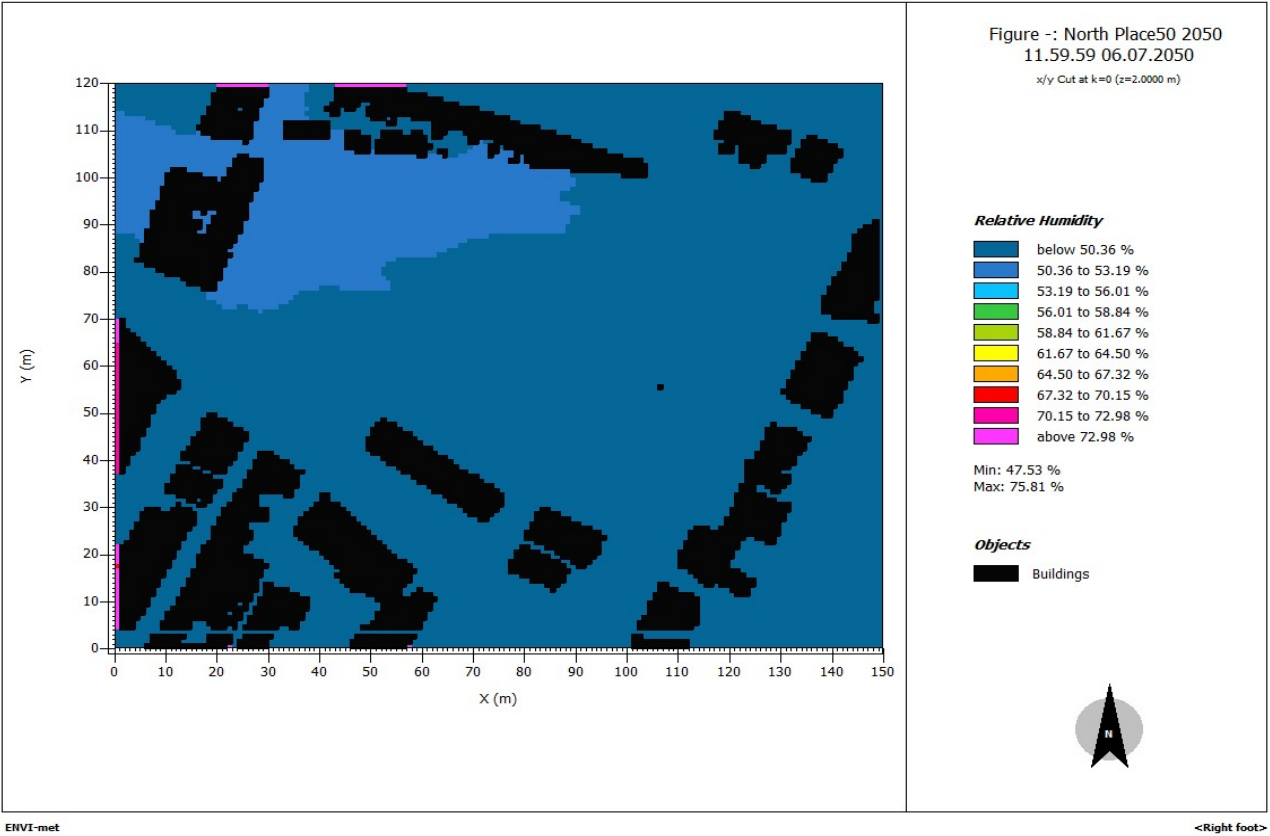



Figure S34: Mean radiant temperature for scenario 50% NBS 2050

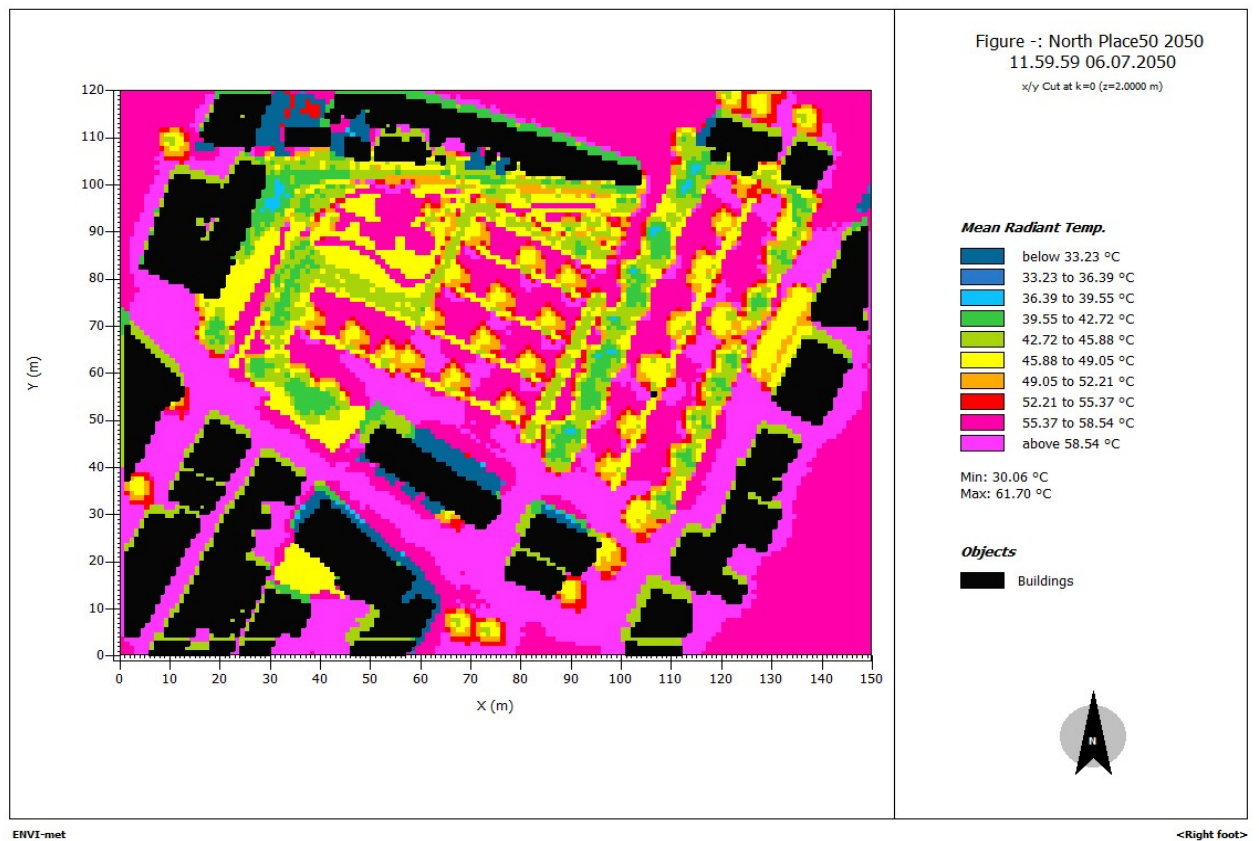

Figure S35: Wind speed for scenario 50% NBS 2050

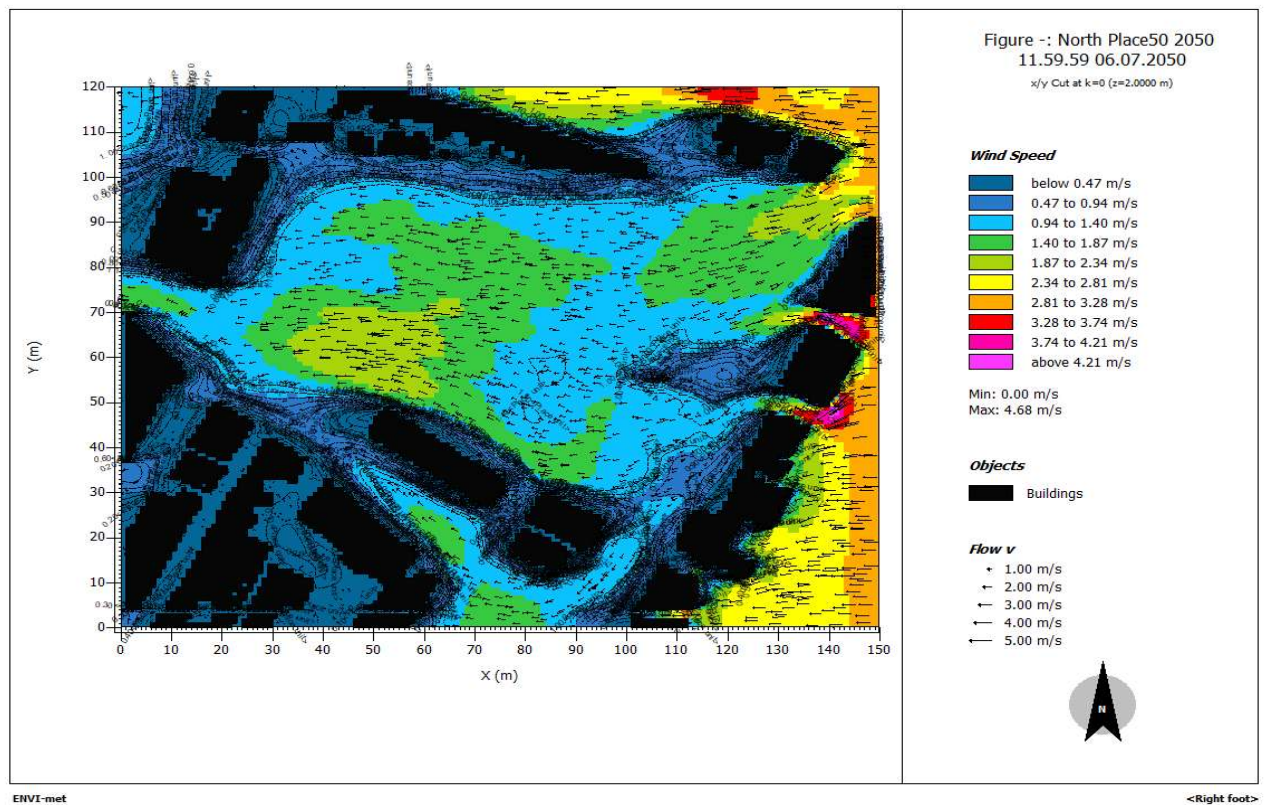

Figure S36: Thermal comfort PMV value for scenario 50% NBS 2050

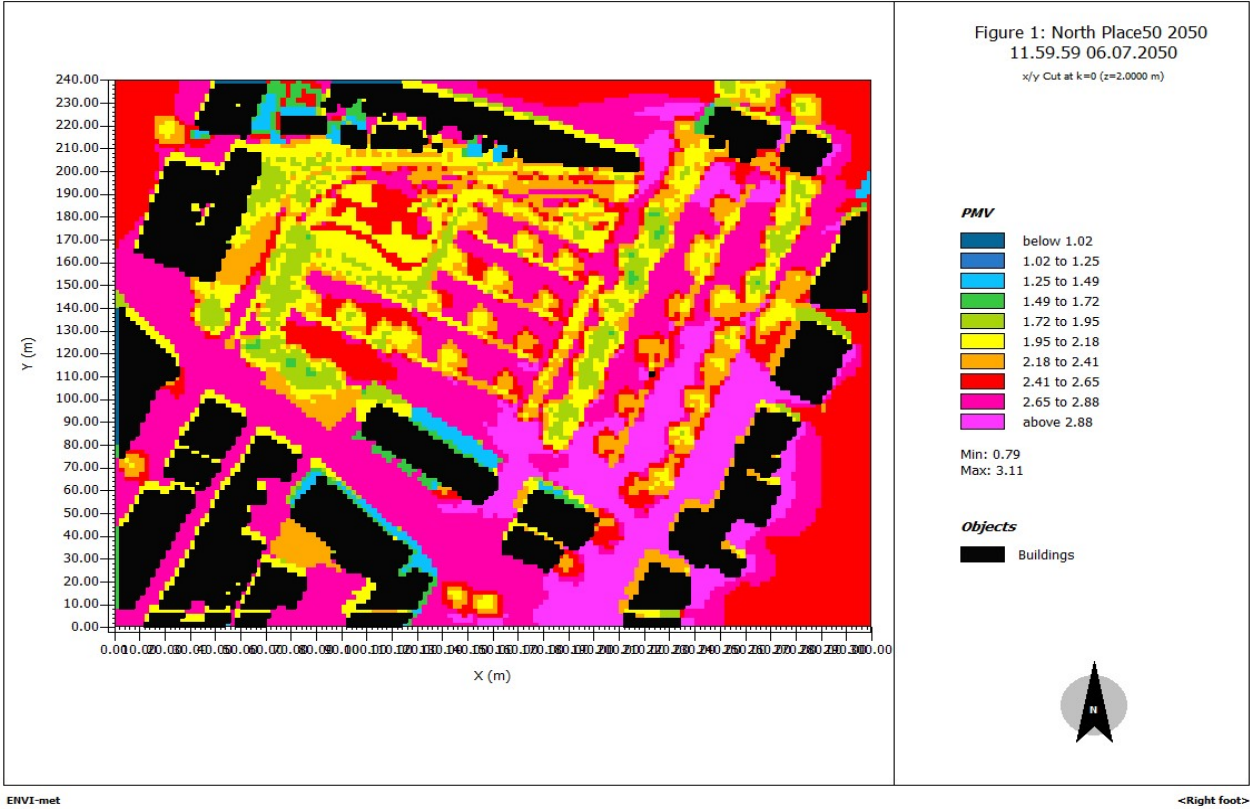

Supplement: s1 [file s1]
